1 BIOLOGICAL SCIENCES: Physiology

2

3 **The prolyl hydroxylase PHD3 maintains  $\beta$ -cell glucose metabolism during fatty**  
4 **acid excess**

5

6 Daniela Nasteska<sup>a,b,c#</sup>, Federica Cuzzo<sup>a,b,c#</sup>, Alpesh Thakker<sup>a,b</sup>, Rula Bany Bakar<sup>d</sup>, Rebecca  
7 Westbrook<sup>a,b</sup>, Ildem Akerman<sup>a,b</sup>, James Cantley<sup>d,e</sup>, Daniel A. Tennant<sup>a,b\*</sup>, David J. Hodson<sup>a,b,c\*</sup>

8

9 <sup>a</sup> Institute of Metabolism and Systems Research (IMSR), University of Birmingham,  
10 Birmingham, UK.

11 <sup>b</sup> Centre for Endocrinology, Diabetes and Metabolism, Birmingham Health Partners,  
12 Birmingham, UK.

13 <sup>c</sup> Centre of Membrane Proteins and Receptors (COMPARE), University of Birmingham,  
14 Birmingham, UK.

15 <sup>d</sup> Department of Physiology, Anatomy and Genetics, University of Oxford, Parks Road, Oxford,  
16 UK

17 <sup>e</sup> Division of Systems Medicine, School of Medicine, University of Dundee, Dundee, Scotland,  
18 UK

19

20 #These authors contributed equally

21 \*Correspondence should be addressed to: [d.tennant@bham.ac.uk](mailto:d.tennant@bham.ac.uk) or [d.hodson@bham.ac.uk](mailto:d.hodson@bham.ac.uk)

22

23

24 **Character count** (excluding abstract, references and figure legends). 37,922

25

26 **ABSTRACT**

27 The alpha ketoglutarate-dependent dioxygenase, prolyl-4-hydroxylase 3 (PHD3), is a hypoxia-  
28 inducible factor target that uses molecular oxygen to hydroxylate proline. While PHD3 has  
29 been reported to influence cancer cell metabolism and liver insulin sensitivity, relatively little  
30 is known about effects of this highly conserved enzyme in insulin-secreting  $\beta$ -cells. Here, we  
31 show that deletion of PHD3 specifically in  $\beta$ -cells ( $\beta$ PHD3KO) is associated with impaired  
32 glucose homeostasis in mice fed high fat diet. In the early stages of dietary fat excess,  
33  $\beta$ PHD3KO islets energetically rewire, leading to defects in the management of pyruvate fate  
34 and a shift away from glycolysis. However,  $\beta$ PHD3KO islets are able to maintain oxidative  
35 phosphorylation and insulin secretion by increasing utilization of fatty acids to supply the  
36 tricarboxylic acid cycle. This nutrient-sensing switch cannot be sustained and  $\beta$ PHD3KO islets  
37 begin to show signs of failure in response to prolonged metabolic stress, including impaired  
38 glucose-stimulated ATP/ADP rises,  $Ca^{2+}$  fluxes and insulin secretion. Thus, PHD3 might be a  
39 pivotal component of the  $\beta$ -cell glucose metabolism machinery by suppressing the use of fatty  
40 acids as a primary fuel source, under obesogenic and insulin resistant states.

41 **Keywords:** beta cell, insulin, metabolic stress, hypoxia, prolyl hydroxylase domain proteins,  
42 PHD3, *Egln3*.

43

44 **SIGNIFICANCE STATEMENT**

45 Prolyl-4-hydroxylase 3 (PHD3) is involved in the oxygen-dependent regulation of cell  
46 phenotype. A number of recent studies have shown that PHD3 might operate at the interface  
47 between oxygen availability and metabolism. To understand how PHD3 influences insulin  
48 secretion, which depends on intact glucose metabolism, we generated mice lacking PHD3  
49 specifically in pancreatic  $\beta$ -cells. These mice, termed  $\beta$ PHD3KO, are apparently normal until  
50 fed high fat diet at which point their  $\beta$ -cells switch to fatty acids as a fuel source. This switch  
51 cannot be tolerated and  $\beta$ -cells in  $\beta$ PHD3KO mice eventually fail. Thus, PHD3 maintains  
52 glucose-stimulated insulin secretion in  $\beta$ -cells during states of fatty acid excess, such as  
53 diabetes and obesity.

54

55

## 56 INTRODUCTION

57 The prolyl-hydroxylase domain proteins (PHD1-3) encoded for by the *Egl-9* homologue  
58 (*EGLN*) genes are alpha ketoglutarate-dependent dioxygenases, which regulate cell function  
59 by catalyzing hydroxylation of prolyl residues within various substrates using molecular  
60 oxygen (1-4). There are three well-described mammalian isozymes: PHD1, PHD2 and PHD3,  
61 which were originally described as hydroxylating the alpha subunit of the transcription factor  
62 Hypoxia-Inducible Factor (HIF) under normoxia (4), thus targeting it for polyubiquitylation and  
63 proteasomal degradation. When oxygen concentration becomes limited, PHD activity  
64 decreases and HIF is stabilized, leading to dimerization with the beta subunit and  
65 transcriptional regulation of target genes regulating the cellular response to hypoxia (5). While  
66 PHDs are generally regarded to be master HIF regulators, it is becoming increasingly apparent  
67 that they target a range of other substrates influencing cell function (6-9).

68 PHD3 is unusual amongst the PHDs: it is transcriptionally regulated by HIF1 during hypoxia  
69 (10) although it does not always act to destabilize HIF1 (11, 12). A number of roles for PHD3  
70 have been described under conditions of stress or hypoxia, including: macrophage influx and  
71 neutrophil survival (13, 14), apoptosis in various cancer models (8, 15, 16), and tumor cell  
72 survival (9) (reviewed in (17)). Due to the dependence of PHD3 on alpha-ketoglutarate and  
73 oxygen for its activity (18), many of these actions are likely to be mediated through alterations  
74 in cell metabolism (19). Indeed, PHD3 increases glucose uptake in cancer cells through  
75 interactions with pyruvate kinase M2 (8, 20). In tumors exhibiting mutations in succinate  
76 dehydrogenase, fumarate hydratase and isocitrate dehydrogenase 1 and 2 (21-23), PHD3  
77 activity is altered by aberrantly high cytosolic concentrations of succinate, fumarate and 2-  
78 hydroxyglutarate (2-HG), suggesting that inactivation of this enzyme might be involved in the  
79 cellular transformation process. PHD3 has more recently been shown to hydroxylate and  
80 activate acetyl-CoA carboxylase 2 (ACC2), defined as the fatty acid oxidation gatekeeper,  
81 thus decreasing fatty acid breakdown and restraining myeloid cell proliferation during nutrient  
82 abundance (24). Together, these studies place PHD3 as a central player in the regulation of  
83 glucose and fatty acid utilization with clear implications for metabolic disease risk.

84 Along these lines, PHD3 has been reported to influence insulin sensitivity in the liver (25, 26),  
85 as well as maintain glucose-stimulated insulin secretion in a rat  $\beta$ -cell line (27). However, little  
86 is known about how PHD3 might contribute to glucose homeostasis and diabetes risk through  
87 effects directly in primary pancreatic  $\beta$ -cells. To ensure the appropriate release of insulin,  $\beta$ -  
88 cells have become well-adapted as glucose sensors. Thus, glucose enters the  $\beta$ -cell by  
89 facilitated diffusion through low affinity glucose transporters (28), before conversion into  
90 glucose-6-phosphate by glucokinase and subsequent splitting into pyruvate (29). The  
91 pyruvate then undergoes oxidative metabolism in the mitochondrial matrix through the  
92 tricarboxylic acid (TCA) cycle, driving increases in ATP/ADP ratio and leading to closure of  
93 ATP-sensitive  $K^+$  channels (30). This cascade triggers membrane depolarization, opening of  
94 voltage-dependent  $Ca^{2+}$  channels, influx of  $Ca^{2+}$ , and  $Ca^{2+}$ -dependent exocytosis of insulin  
95 vesicles through interactions with the SNARE machinery (30). Together with repression of  
96 hexokinase, monocarboxylic acid transporter 1 and lactate dehydrogenase A (31, 32),  
97 stimulus-secretion coupling prevents the inappropriate release of insulin in response to low  
98 glucose, amino acids or lactate.

99 Given its reported roles in dictating fuel preference, we hypothesized that PHD3 might function  
100 as a pivotal component of the  $\beta$ -cell glucose-sensing machinery by suppressing the use of

101 fatty acids as an energy source (27). To further investigate PHD3-regulated  $\beta$ -cell function in  
102 depth, we subjected a model of  $\beta$ -cell-specific *Egln3*, encoding for PHD3, deletion to extensive  
103 *in vivo* and *in vitro* characterization, including detailed stable isotope-resolved metabolic  
104 tracing. Here, we show that loss of PHD3 causes metabolic remodelling in the early stages of  
105 metabolic stress by shifting  $\beta$ -cell fuel source from glucose to fatty acids. However, this  
106 metabolic switch is overwhelmed as fatty acids accumulate, ultimately leading to  $\beta$ -cell failure.  
107 As such, PHD3 is likely to constitute a fundamental mechanism to restrain fatty acid utilization  
108 and maintain glucose-sensing in  $\beta$ -cells during early stages of metabolic stress and insulin  
109 resistance.

110

## 111 RESULTS

### 112 PHD3 knockout does not induce a hypoxic gene expression phenotype

113 We first generated a model of  $\beta$ -cell PHD3 knockout ( $\beta$ PHD3KO) by crossing the *Ins1Cre*  
114 deleter strain (33) with animals harboring flox'd alleles for *Egln3* (34), which encodes PHD3.  
115 Recombination efficiency of the *Ins1Cre* line was verified in-house by crossing to mTmG  
116 reporter animals and was found to be >90%. Gene expression analyses showed a 2-fold  
117 reduction in *Egln3* in  $\beta$ PHD3KO islets (Figure 1A). Western blotting revealed a similar ~50%  
118 knockdown of PHD3 protein in  $\beta$ PHD3KO islets (Figure 1B), the remainder most likely  
119 reflecting the relatively higher levels of *Egln3* detected in  $\alpha$ -cells, as shown by RNA-seq (35,  
120 36). While we attempted immunofluorescence staining, we could not detect a specific signal  
121 in  $\beta$ -cells, probably reflecting known sensitivity issues with PHD3 antibodies. Previous studies  
122 have shown that PHD3 is highly regulated at the transcriptomic level by hypoxia (10), and in  
123 line with this, we also found that *Egln3* levels in hypoxic (1% O<sub>2</sub>)  $\beta$ PHD3CON islets were highly  
124 upregulated (Figure 1C). While *Egln3* is expressed at low abundance in sorted  $\beta$ -cells (35,  
125 36), this is likely to be a result of profound re-oxygenation following dissociation, thus  
126 suppressing *Egln3* expression (37).

127 To account for HIF-dependent effects on  $\beta$ -cell phenotype in  $\beta$ PHD3KO animals, a number of  
128 canonical HIF1 $\alpha$ -target genes were assessed. Notably, levels of *Bnip3* and *Car9* were similar  
129 between normoxic (21% O<sub>2</sub>)  $\beta$ PHD3CON and  $\beta$ PHD3KO islets (Figure 1D-F). Further  
130 suggesting the presence of intact HIF signaling, *Bnip3*, *Car9* were upregulated to similar levels  
131 in hypoxic (1% O<sub>2</sub>)  $\beta$ PHD3CON and  $\beta$ PHD3KO islets (Figure 1D-F), while GlIs did not reliably  
132 increase (Figure 1D-F). Lastly, glucose and KCl-stimulated Ca<sup>2+</sup> fluxes, shown to be sensitive  
133 to HIF stabilization (38), were similar in  $\beta$ PHD3CON and  $\beta$ PHD3KO islets exposed to hypoxia  
134 (Figure 1G-J).

### 135 PHD3 does not contribute to glucose homeostasis and insulin release under normal 136 diet

137 Male and female  $\beta$ PHD3KO mice presented with normal growth curves from 8-18 weeks of  
138 age compared to  $\beta$ PHD3CON littermates (Figure 2A and B). Glucose tolerance testing in the  
139 same animals showed no abnormalities in glycemia (Figure 2C and D), which did not change  
140 up until the age of 20 weeks (Figure 2E and F). As expected,  $\beta$ PHD3KO mice displayed similar  
141 insulin sensitivity (Figure 2G), islet size distribution and  $\beta$ -cell mass (Figure 2H-J) to their  
142  $\beta$ PHD3CON littermates.

143 Isolation of islets for more detailed *in vitro* workup revealed normal expression of the  $\beta$ -cell  
144 transcription factors/differentiation markers *Pdx1*, *Mafa* and *Nkx6-1* in  $\beta$ PHD3KO islets (Figure  
145 3A-C). Further suggestive of mature  $\beta$ -cell function, live imaging approaches revealed intact  
146 glucose-stimulated ATP/ADP ratios (Figure 3D and E) and Ca<sup>2+</sup> fluxes (Figure 3F and G) in  
147  $\beta$ PHD3KO islets. While glucose-stimulated insulin secretion was similar in islets isolated from  
148  $\beta$ PHD3CON and  $\beta$ PHD3KO animals, responses to the incretin-mimetic Exendin-4 (Ex4) were  
149 blunted (Figure 3H). This defect in Ex4-potentiated insulin secretion was not due to reductions  
150 in *Glp1r* expression (Figure 3I) or cAMP responses to the incretin-mimetic (Figure 3J and K).  
151 Moreover, oral glucose tolerance, largely determined by incretin release from the intestine  
152 (39), was similar in  $\beta$ PHD3CON and  $\beta$ PHD3KO mice (Figure 3L).

### 153 Loss of PHD3 improves insulin secretion at the onset of metabolic stress

154 We next examined whether PHD3 might play a more important role in regulating insulin  
155 release during metabolic stress. Indeed, the increase in islet size that occurs during insulin  
156 resistance is associated with a hypoxic state (40), expected to increase PHD3 levels via HIF1  
157 activity (41). Therefore, animals were placed on high fat diet (HFD) to induce obesity and  
158 metabolic stress(42).

159 Following 4 weeks HFD, *Egln3* was mildly but significantly upregulated in  $\beta$ PHD3CON islets  
160 (Figure 4A). As expected, *Egln3* levels remained suppressed in 4 weeks HFD  $\beta$ PHD3KO islets  
161 (Figure 4A). Glucose tolerance testing revealed significantly impaired glucose homeostasis in  
162  $\beta$ PHD3KO mice at 4 weeks but not at 72 hours HFD (Figure 4B and C), despite similar body  
163 weight gain compared to  $\beta$ PHD3CON littermates (Figure 4D). As expected, fasting blood  
164 glucose levels were elevated in  $\beta$ PHD3CON mice following 4 weeks HFD (Figure 4E). There  
165 was no effect of Cre or flox'd alleles *per se* on glucose tolerance following 4 weeks HFD  
166 (Figure 4F). Glucose-stimulated insulin secretion *in vivo* was however increased in 4 weeks  
167 HFD  $\beta$ PHD3KO mice (Figure 4G), suggesting that glucose intolerance might be associated  
168 with hyperinsulinemia (43). These increases in circulating insulin were associated with an  
169 almost 2-fold increase in  $\beta$ -cell mass in 4 weeks HFD  $\beta$ PHD3KO mice (Figure 4H and I),  
170 associated with a significant increase in the proportion of larger islets (Figure 4J). In addition,  
171 islets isolated from the same animals secreted significantly more insulin in glucose-stimulated  
172 and Ex4-potentiated states (Figure 4K). Increased islet size or insulin expression induced by  
173 HFD were unlikely to account for the overall increase in *in vitro* insulin secretion, since all  
174 measures were corrected for insulin content. *Bnip3* and *Gls* levels remained unchanged  
175 (Figure 4L and M), while *Car9* was downregulated (Figure 4N), suggesting that HIF1 $\alpha$   
176 stabilization was unlikely to be a major feature in HFD  $\beta$ PHD3KO islet.

177 Thus,  $\beta$ PHD3KO mice are glucose intolerant on HFD, but their islets are larger and show  
178 improved insulin secretion. These data raise the possibility that nutrient-sensing and utilization  
179 might be altered in  $\beta$ PHD3KO islets.

### 180 **PHD3 maintains glucose metabolism in $\beta$ -cells**

181 Given the reported roles of PHD3 in glycolysis, we wondered whether the changes in  $\beta$ -cell  
182 function observed during the early phases of high fat feeding in  $\beta$ PHD3KO mice might be  
183 associated with changes in glucose metabolism. We first looked at glycolytic fluxes using  $^{14}\text{C}$   
184 glucose. While glucose oxidation was not altered at low or high glucose in islets from 4 weeks  
185 HFD  $\beta$ PHD3KO mice (Figure 5A), there was a small but significant decrease in  $^{14}\text{C}$  content in  
186 the aqueous phase, indicating a net reduction in tricarboxylic acid (TCA) cycle/other  
187 metabolites derived from glycolysis (Figure 5B). Notably, a 2-fold reduction in incorporation of  
188 glucose into the lipid pool (i.e. glucose-driven lipogenesis) was also detected in 4 weeks HFD  
189  $\beta$ PHD3KO islets (Figure 5C), suggestive of decreased glycolytic flux through the TCA cycle  
190 and acetyl-CoA carboxylase 1 (ACC1) (44).

191 To gain a higher resolution analysis of glucose fate, stable isotope-resolved tracing was  
192 performed in  $\beta$ PHD3KO islets using  $^{13}\text{C}_6$ -glucose. GC-MS-based  $^{13}\text{C}_6$  mass isotopomer  
193 distribution analysis showed no differences in glucose incorporation into aspartate, glutamate,  
194 malate, fumarate or citrate in either standard chow or 4 weeks HFD  $\beta$ PHD3CON and  
195  $\beta$ PHD3KO islets (Figure 5D-H). Thus, while the contribution of glucose to aqueous cellular  
196 metabolite pools is clearly reduced in 4 weeks HFD  $\beta$ PHD3KO islets (Figure 5B), there is no  
197 net change in the incorporation of glucose into each metabolite i.e. the TCA cycle proceeds

198 normally despite lowered glucose fluxes. Islets from animals fed standard chow showed m+2  
199 lactate accumulation (Figure 5I), which is consistent with lactate normally produced as a result  
200 of oxidative metabolism of glucose-derived pyruvate. However, during HFD there was a  
201 pronounced switch to reduction of pyruvate to lactate (indicated by the m+3 isotopomer) in  
202 both genotypes.

203 Further analysis of steady-state lactate levels showed a significant increase in lactate  
204 production in islets from HFD-fed  $\beta$ PHD3KO versus  $\beta$ PHD3CON mice (Figure 5J). Together  
205 with the m+2  $\rightarrow$  m+3 switch, this finding confirms initial measures with  $^{14}\text{C}$  glucose indicating  
206 reduced fueling of the TCA cycle by glycolysis (Figure 5K). Furthermore, the tracing data  
207 suggest that 4 weeks HFD  $\beta$ PHD3KO islets increase the reduction of pyruvate to support  
208 continued glycolysis through regeneration of the cytosolic  $\text{NAD}^+$  pool. The source of the lactate  
209 was unlikely to be through increases in expression of the “disallowed” gene lactate  
210 dehydrogenase A (*Ldha*) (31, 32), since *Ldha* levels were unchanged between  $\beta$ PHD3CON  
211 and  $\beta$ PHD3KO islets (Figure 5L).

212 Together, these data suggest that metabolic stress induces defects in the management of  
213 pyruvate fate in  $\beta$ PHD3KO islets, implying that insulin secretion must be maintained and even  
214 amplified through mechanisms other than glycolysis *in vitro*.

#### 215 **PHD3 suppresses fatty acid use under metabolic stress**

216 We hypothesized that  $\beta$ PHD3KO islets might switch to an alternative energy source to sustain  
217 their function, namely beta oxidation of fatty acids, which are present in excess during HFD.  
218 Moreover, in cancer cells PHD3 has been shown to increase activity of ACC2, which converts  
219 acetyl-CoA  $\rightarrow$  malonyl-CoA, the latter suppressing carnitine palmitoyltransferase I (CPT1), the  
220 rate-limiting step in fatty acid oxidation (24). Indicating a profound change in  $\beta$ -cell nutrient  
221 preference, supplementation of culture medium with the fatty acid palmitate for 48 hours  
222 augmented glucose-stimulated and Ex4-potentiated insulin secretion in 4 weeks HFD  
223  $\beta$ PHD3KO islets (Figure 6A). By contrast, 4 weeks HFD  $\beta$ PHD3CON islets showed no  
224 increase in glucose-stimulated insulin release following culture with palmitate (Figure 6B),  
225 confirming that the fatty acid was unlikely to induce lipotoxicity at the concentration and timing  
226 used here. Interestingly, 48 hrs incubation with palmitate increased Ex4-potentiated insulin  
227 secretion in 4 weeks HFD  $\beta$ PHD3CON islets (Figure 6B).

228 Further confirming a switch away from glycolysis, glucose-stimulated ATP/ADP ratios were  
229 markedly decreased in 4 weeks HFD  $\beta$ PHD3KO islets (Figure 6C-E), despite the increased  
230 insulin secretion (Figure 4K). While downstream  $\text{Ca}^{2+}$  fluxes were apparently normal in 4  
231 weeks HFD  $\beta$ PHD3KO islets, this was likely due to increased sensitivity of voltage-dependent  
232  $\text{Ca}^{2+}$  channel to membrane depolarization, since responses to KCl were significantly elevated  
233 (Figure 6F and G). Suggesting that CPT1 activity might be upregulated in 4 weeks HFD  
234  $\beta$ PHD3KO islets, experiments were performed at high glucose, normally expected to inhibit  
235 CPT1 and fatty acid utilization through generation of malonyl-CoA, and mRNA levels of *Cpt1a*  
236 tended to be increased (Figure 6H). Moreover, application of the CPT1 inhibitor etomoxir was  
237 able to augment ATP/ADP responses to glucose in 4 weeks HFD  $\beta$ PHD3KO but not in  
238  $\beta$ PHD3CON islets (Figure 6I). In line with this finding, culture with low palmitate concentrations  
239 decreased glucose-stimulated  $\text{Ca}^{2+}$  fluxes in 4 weeks HFD  $\beta$ PHD3KO (Figure 6J) but not in  
240  $\beta$ PHD3CON islets (Figure 6K), presumably due to increased flux of acetyl-CoA into the TCA  
241 cycle.

242 Thus, following 4 weeks HFD,  $\beta$ PHD3KO islets become less reliant on glycolysis to fuel  
243 ATP/ADP production, are able to sustain oxidative phosphorylation through fatty acid  
244 oxidation, and secrete more insulin when both glucose and fatty acids are present. These  
245 changes, which are in agreement with our initial *in vivo* and *in vitro* phenotyping data (Figure  
246 4), are shown schematically in Figure 6L.

#### 247 **ACC1 and ACC2 are differentially regulated at the promoter level in $\beta$ -cells**

248 ACC1 and ACC2 are enzymes that catalyze the carboxylation of acetyl-CoA to malonyl-CoA,  
249 the rate-limiting step in fatty acid synthesis.  $\beta$ -cells are thought to predominantly express  
250 ACC1 (45, 46), which supplies cytosolic malonyl-CoA to fatty acid synthase for *de novo* lipid  
251 biosynthesis rather than for beta oxidation (44). By contrast,  $\beta$ -cells are reported to express  
252 negligible levels of ACC2, which inhibits CPT1 through generation of mitochondrial malonyl-  
253 CoA to suppress use of fatty acids via beta oxidation (45, 46).

254 To explore potential mechanisms that might underlie the changes occurring in 4 weeks HFD  
255  $\beta$ PHD3KO islets, we decided to interrogate multiple published bulk islet and purified  $\beta$ -cell  
256 gene expression datasets (35, 47, 48). Notably, *ACACB* (encoding ACC2) was found to be  
257 present in  $\beta$ -cells, albeit at lower levels than *ACACA* (encoding ACC1) (Figure 7A). The  
258 expression levels of *ACACB* were significant, however, reaching similar levels to the  $\beta$ -cell  
259 transcription factor *HNF1A* (Figure 7A).

260 Closer examination of the promoter of *ACACB* gene in islets also revealed regulation by a  
261 number of established  $\beta$ -cell transcription factors, such as PDX1, MAFB and NKX2-2 (Figure  
262 7B), further confirming the regulated expression of this gene. Unusually, a long non-coding  
263 RNA (lncRNA), transcribed antisense to the *ACACB* gene, was detected (Figure 7B),  
264 consistent with the presence of a negative regulatory mechanism for the expression of this  
265 gene in one or more cell types in the islet.

266 Suggesting that any regulation of ACC1/ACC2 by PHD3 is likely to be post-translational, as  
267 expected for a hydroxylase, qPCR analyses showed that both *Acaca* and *Acacb* expression  
268 were similar in 4 weeks HFD  $\beta$ PHD3CON and  $\beta$ PHD3KO islets (Figure 7C and D).

269 Thus, according to next generation sequencing, *ACACB* is reproducibly expressed in  $\beta$ -cells,  
270 but at levels lower than *ACACA*. Assuming that protein translation occurs, ACC2 might  
271 conceivably contribute to fatty acid oxidation in the absence of PHD3.

#### 272 **PHD3 protects against lipotoxicity following prolonged metabolic stress**

273 Lastly, we sought to investigate whether islets would eventually decompensate when faced  
274 with continued fatty acid/nutrient abundance. Glucose intolerance was still present in  
275  $\beta$ PHD3KO mice following 8 weeks on HFD (Figure 7E), despite normal insulin sensitivity  
276 (Figure 7F). By this point, however, impaired glucose-stimulated insulin secretion (Figure 7G)  
277 was apparent in isolated  $\beta$ PHD3KO islets. This secretory deficit could be rescued by  
278 application of Ex4 to sensitize insulin granules to exocytosis (Figure 7G). In addition, the  
279 amplitude of glucose-stimulated  $Ca^{2+}$  rises was significantly reduced in 8 weeks HFD  
280  $\beta$ PHD3KO compared to  $\beta$ PHD3CON islets (Figure 7H and I). Suggesting that profound  
281 defects in voltage-dependent  $Ca^{2+}$  channels might also be present, responses to the generic  
282 depolarizing stimulus KCl were markedly blunted in the same islets (Figure 7H and I). While  
283 apoptosis was increased in 8 weeks HFD  $\beta$ PHD3KO islets (Figure 7J and K),  $\alpha$ -cell/ $\beta$ -cell ratio



284 (Figure 7L) and expression of the ER stress markers *Ddit3*, *Xbp1* and *Hspa5* (Figure 7M)  
285 remained unchanged. Lastly, the HIF2 $\alpha$ -target genes *Ccnd1* and *Dll4* were found to be either  
286 unchanged or downregulated in 8 weeks HFD  $\beta$ PHD3KO islets (Figure 7N), suggesting that  
287 HIF2 $\alpha$  stabilization was unlikely to be the sole determinant of phenotype.

## 288 DISCUSSION

289 In the present study, we build upon previous observations that chemical inhibition of all three  
290 PHD enzymes in islets and  $\beta$ -cell lines leads to alterations in glucose-stimulated insulin  
291 secretion (27). Specifically, we show that the alpha-ketoglutarate-dependent PHD3 maintains  
292  $\beta$ -cell glucose sensing under states of metabolic stress and insulin resistance associated with  
293 fatty acid abundance. Our data suggest that PHD3 is required for ensuring that acetyl-CoA  
294 derived from glycolysis preferentially feeds the TCA cycle, linking blood glucose levels with  
295 ATP/ADP generation,  $\beta$ -cell electrical activity and insulin secretion. Loss of PHD3 leads to  
296 metabolic remodeling under HFD, resulting in a decrease in glycolytic fluxes, an increase in  
297 lactate accumulation and utilization of fatty acids as an energy source. This switch cannot be  
298 maintained, however, and  $\beta$ -cells eventually fail following prolonged exposure to fatty acids.  
299 Thus, PHD3 appears to be a critical component of the  $\beta$ -cell metabolic machinery required for  
300 glucose sensing during episodes of nutritional overload.

301 How does PHD3 maintain glucose metabolism in  $\beta$ -cells? Previous studies in cancer cells  
302 have shown that PHD3 hydroxylates and activates ACC2, suppressing beta oxidation (24).  
303 While  $\beta$ -cells are thought to predominantly express ACC1, the levels of *ACACB*, which  
304 encodes ACC2, were found to be similar to the  $\beta$ -cell transcription factor HNF1A, albeit much  
305 lower than for *ACACA*. Intriguingly, *ACACB* was enriched for promoter sites suggestive of  
306 negative regulation, which is unusual amongst  $\beta$ -cell genes, and *Acaca/Acacb* were not  
307 upregulated in HFD  $\beta$ PHD3CON or  $\beta$ PHD3KO islets. This supports a potential role for post-  
308 transcriptional modifications in determining ACC2 activity. We thus propose that loss of PHD3  
309 might lead to suppression of ACC2 activity, which becomes apparent during HFD when its  
310 substrate is present in abundance. Alternatively, PHD3 might hydroxylate and activate ACC1,  
311 leading to regulation of CPT1 by malonyl-CoA when fatty acids are supplied in excess, as  
312 suggested by glucose oxidation experiments. In any case, experiments with etomoxir strongly  
313 infer a role for CPT1 in the negative effects of PHD3 deletion on glucose metabolism. While  
314 etomoxir has been shown to target complex I of the electron transport to lower ATP production  
315 (49), we don't think this played a major role here, since ATP levels were restored in  $\beta$ PHD3KO  
316 islets treated with the inhibitor.

317 Identifying the efficiency of protein translation for *ACACB*  $\rightarrow$  ACC2, as well as the PHD3  
318 hydroxylation sites involved, will be critical. However, currently available antibodies for  
319 detection of ACC2, as well its hydroxylated forms, are poor. Moreover, assigning hydroxylation  
320 targets using mass spectrometry is controversial: mis-alignment of hydroxylation is commonly  
321 associated with the presence of residues in the tryptic fragment that can be artefactually  
322 oxidised (50). Thus, studies using animals lacking both PHD3 and ACC2 specifically in  $\beta$ -cells  
323 would be required to definitively link the carboxylase with the phenotype here.

324 As normal chow contains a low proportion of calories from fat, metabolic stress was needed  
325 to reveal the full *in vitro* and *in vivo* phenotype associated with PHD3 loss. These data also  
326 support an effect of PHD3 on ACC1/2 and CPT1, since without acyl-CoA derived from  
327 exogenous fatty acids, glucose would still constitute the primary fuel source and regulator of  
328 insulin release. The lack of phenotype under normal diet is unlikely to reflect the age of the  
329 animals, since even at 20 weeks of age, glucose intolerance was still not present in  $\beta$ PHD3KO  
330 mice. An alternative explanation is that loss of PHD3 can be compensated under normal  
331 conditions, while other mechanisms associated with fatty acid excess and lipogenesis, for  
332 example ER stress (51, 52), also contribute to the  $\beta$ PHD3KO phenotype. We feel that this

333 explanation is less likely, however, since we could not detect upregulation of *Ddit3*, *Xbp1* and  
334 *Hspa5* even following 8 weeks HFD.

335 Suggesting that the phenotype associated with PHD3 loss was not solely due to HIF, no  
336 differences in the gene expression of HIF1 targets could be detected in  $\beta$ PHD3KO versus  
337  $\beta$ PHD3CON islets. Indeed, PHD2 is the major hydroxylase that regulates HIF1 $\alpha$  stability (11,  
338 12), with no changes in activity of the transcription factor detected following PHD3 loss (11,  
339 12, 53). Thus, it is perhaps unsurprising that there is a lack of HIF1 transcriptional signature  
340 in  $\beta$ PHD3KO islets, in agreement with previous studies in other tissues (53, 54). In addition,  
341 glucose-stimulated Ca<sup>2+</sup> fluxes, a sensitive readout of changes in oxygen-dependent  
342 regulation (38), were unaffected during hypoxia in  $\beta$ PHD3KO islets. Lastly, no changes in  
343 expression of the HIF1-sensitive gene *Ldha* (55) were detected. Nonetheless, we cannot  
344 completely exclude HIF-dependent effects, and as such, studies should either be repeated on  
345 a HIF1- and HIF2-null background (i.e. a quadruple transgenic) or using (moderately) specific  
346 chemical inhibitors.

347 An intriguing observation was that PHD3 deletion decreased Exendin-4- but not glucose-  
348 stimulated insulin secretion in islets from animals fed standard chow. Given that *Glp1r*  
349 expression and signaling remained intact in  $\beta$ PHD3KO islets, alterations in cytosolic glutamate  
350 accumulation might instead be present, previously shown to prime incretin-responsiveness  
351 following its release with insulin from the granule (56). Arguing against this, however,  
352 interrogation of the metabolic tracing data showed that steady-state glutamate levels were  
353 unchanged between  $\beta$ PHD3CON and  $\beta$ PHD3KO islets, meaning that glucose was still able to  
354 enter the malate-aspartate shuttle to produce the neurotransmitter. It will be interesting in the  
355 future to pinpoint how PHD3 impinges upon Ex4-potentiated insulin secretion.

356 In summary, PHD3 possesses a conserved role in gating nutrient preference toward glucose  
357 and glycolysis during both cell transformation (24) and metabolic stress (here). It will be  
358 interesting to now study whether similar effects of PHD3 are present in other cell types  
359 involved in glucose-sensing (for example, pancreatic alpha cells, hypothalamic neurons).

360

## 361 MATERIALS AND METHODS

### 362 Study design

363 No data were excluded unless the cells displayed a non-physiological state (i.e. impaired  
364 viability). All individual data points are reported. The measurement unit is animal or batch of  
365 islets, with experiments replicated independently. Animals and islets were randomly allocated  
366 to treatment groups to ensure that all states were represented in the different experiment arms.

### 367 Study approval

368 Animal studies were regulated by the Animals (Scientific Procedures) Act 1986 of the U.K.,  
369 and approval was granted by the University of Birmingham's Animal Welfare and Ethical  
370 Review Body.

### 371 Mouse models

372  $\beta$ -cell-specific PHD3 ( $\beta$ PHD3KO) knockout mice were generated using the Cre-LoxP system.  
373 *Ins1Cre* mice (JAX stock no. 026801), with Cre-recombinase knocked into the *Ins1* gene locus  
374 (34), were crossbred to mice carrying *lox'd* alleles for PHD3 (*Egln3<sup>fl/fl</sup>*) (9). Adult male and  
375 female  $\beta$ PHD3KO animals (*Ins1Cre<sup>+/-</sup>;Egln3<sup>fl/fl</sup>*) and their controls ( $\beta$ PHD3CON) (*Ins1<sup>wt/wt</sup>-*  
376 *;Egln3<sup>fl/fl</sup>*, *Ins1Cre<sup>+/-</sup>;Egln3<sup>wt/wt</sup>* and *Ins1<sup>wt/wt</sup>;Egln3<sup>wt/wt</sup>*) were used from 8-20 weeks of age. No  
377 extra-pancreatic recombination has been observed in *Ins1Cre* mice and possession of a *Cre*  
378 allele is not associated with any changes in glucose homeostasis in our hands (33, 57). Given  
379 recently reported issues with allele-silencing in some *Ins1Cre* colonies (58), recombination  
380 efficiency of our line was regularly monitored and verified to be >90% using ROSA<sup>mT/mG</sup>  
381 reporter animals (59). Animals were maintained on a C57BL/6J background and backcrossed  
382 for at least 6 generations following re-derivation into the animal facility. Lines were regularly  
383 refreshed by crossing to bought-in C57BL/6J (Charles River).  $\beta$ PHD3CON and  $\beta$ PHD3KO  
384 mice were fed standard chow (SC) and/or high fat diet containing 60% fat (HFD), with body  
385 weight checked weekly until 18 weeks of age. Animals were maintained in a specific pathogen-  
386 free facility, with free access to food and water.

### 387 Intraperitoneal and oral glucose tolerance testing

388 Mice were fasted for 4-6 hours, before intraperitoneal injection of glucose (1-2 g/kg body  
389 weight). Blood samples for glucose measurement were taken from the tail vein at 0, 15, 30,  
390 60, 90 and 120 min post-challenge. Glucose was measured using a Contour XT glucometer  
391 (Bayer, Germany). For mice on SC, intraperitoneal glucose tolerance testing (IPGTT) was  
392 performed every 2-4 weeks, between 8-20 weeks of age. HFD-fed mice underwent IPGTT  
393 following 4 and 8 weeks of HFD. Oral glucose tolerance testing (OGTT) was performed as for  
394 IPGTT, except that 2 g/kg body weight glucose was delivered using an oral gavage tube.

### 395 Serum insulin

396 Blood samples were collected following intraperitoneal glucose injection (1-2 g/kg body  
397 weight). Serum was separated by centrifugation (2500 rpm/10 min/4°C), before assaying  
398 using a HTRF Mouse Serum Insulin Assay kit assay (Cisbio, France). Due to NC3R limits on  
399 blood sample volumes, insulin was only measured at 0, 15 and 30 min post-glucose injection.

### 400 Insulin tolerance test (ITT)

401 Mice fasted for 4-6 hours (SC cohort) or 14-16 hours (HFD cohort) received 0.75 U/kg body  
402 weight insulin (Humulin S, 100 U/ml, Lilly, UK) given by intraperitoneal injection. Blood glucose  
403 was measured at 0, 15, 30, 60, 90 and 120 min post-insulin injection.

#### 404 **Islet isolation**

405 Islets were isolated following bile duct injection with Serva NB8 1 mg/ml collagenase and  
406 Histopaque/Ficoll gradient separation. Islets were cultured in RPMI medium containing 10%  
407 FCS, 100 units/mL penicillin, and 100 µg/mL streptomycin at 5% CO<sub>2</sub>, 37°C. For experiments  
408 under hypoxia, islets were incubated in a Don Whitely H35 Hypoxystation, allowing oxygen  
409 tension to be finely regulated at either 1% or 21%. For experiments with exogenous lipids,  
410 islets were treated with either 0.75% bovine serum albumin (BSA) control, or 150µM sodium  
411 palmitate dissolved in 0.75% BSA.

#### 412 **Gene expression**

413 Trizol purification was used for mRNA extraction, while cDNA was synthesized by reverse  
414 transcription. Gene expression was detected by real time PCR (qPCR), using PowerUp SYBR  
415 Green Master Mix (Thermofisher Scientific) and quantification was based on the  $2^{-\Delta\Delta C_t}$  method,  
416 expressed as fold-change in gene expression. The following primers were used: *Ppia* (forward  
417 5' AAGACTGAGTGGTTGGATGG 3', reverse 5' ATGGTGATCTTCTTGCTGGT 3'), *Actb*  
418 (forward 5' CGAGTCGCGTCCACCC 3', reverse 5' CATCCATGGCGAACTGGTG 3'), *Egln3*  
419 (beginning of exon2) (forward 5' GCTTGCTATCCAGGAAATGG 3', reverse 5'  
420 GCGTCCCAATTCTTATTCAG 3'), *Egln3* (end of exon1) (forward 5'  
421 GGCTGGGCAAATACTATGTCAA 3', reverse 5' GGTTGTCCACATGGCGAACA 3'), *Bnip3*  
422 (forward 5' CTGGGTAGAACTGCACTTCAG 3', reverse 5' GGTTGTCCACATGGCGAACA  
423 3'), *Car9* (forward 5' GGAGCTACTTCGTCCAGATTCAT 3', reverse 5'  
424 CCGGAACTGAGCCTATCCAAC 3'), *Gls* (forward 5' TTCGCCCTCGGAGATCCTAC 3',  
425 reverse 5' CCAAGCTAGGTAACAGACCCT 3'), *Ldha* (forward 5'  
426 TTCAGCGCGGTTCCGTTAC 3', reverse 5' CCGGCAACATTCACACCAC 3'), *Cpt1a* (forward  
427 5' CTCCGCCTGAGCCATGAAG 3', reverse 5' CACCAGTGATGATGCCATTCT 3'), *Acaca*  
428 (forward 5' CTTCTGACAAACGAGTCTGG 3', reverse 5' CTGCCGAAACATCTCTGGGA  
429 3'), *Acacb* (forward 5' CCTTTGGCAACAAGCAAGGTA 3', reverse 5'  
430 AGTCGTACACATAGGTGGTCC 3'), *Pdx1* (forward 5' CCAAAGCTCACGCGTGGA 3',  
431 reverse 5' TGTTTTCTCGGGTTCCG 3'), *Nkx6-1* (forward 5' GCCTGTACCCCCATCAAG  
432 3', reverse 5' GTGGGTCTGGTGTGTTTTCTCTT 3'), *Mafa* (forward 5'  
433 CTTAGCAAGGAGGAGGTCATC 3', reverse 5' CGTAGCCGCGGTTCTTGA 3'), *Ddit3*  
434 (forward 5' CTGGAAGCCTGGTATGAGGAT 3', reverse 5'  
435 CAGGGTCAAGAGTAGTGAAGGT 3'), *Xbp1* (forward 5' AGCAGCAAGTGGTGGATTTG 3',  
436 reverse 5' GAGTTTTCTCCCGTAAAAGCTGA 3'), *Hspa5*, (forward 5'  
437 ACTTGGGGACCACCTATTCCT 3', reverse 5' GTTGCCCTGATCGTTGGCTA 3'), *Ccnd1*,  
438 (forward 5' GCGTACCCTGACACCAATCTC 3', reverse 5' CTCCTCTTCGCACTTCTGCTC  
439 3') and *Dil4*, (forward 5' TTCCAGGCAACCTTCTCCGA 3', reverse 5'  
440 ACTGCCGCTATTCTTGTTCC 3').

#### 441 **Western Blot**

442 Proteins of interest were lysed in 1x Laemmli buffer and separated using SDS-PAGE before  
443 transfer onto a nitrocellulose membrane. After blocking, primary rabbit anti-PHD3 1:1000

444 (Abcam, ab184714) or mouse anti-actin 1:2000 (Sigma-Aldrich, A4700) antibodies were  
445 diluted in 5% milk before incubation overnight on a shaker. Detection was performed using  
446 secondary goat anti-rabbit IgG 1:1000 (Cell Signaling, 7074S) or horse anti-mouse IgG 1:2000  
447 (Cell Signaling, 7076S) and ECL. Protein quantification was based on blot intensity, measured  
448 using ImageJ (NIH).

#### 449 **Immunohistochemistry**

450 Pancreata were isolated, fixed in 10% formalin and embedded in paraffin. Paraffin slides were  
451 deparaffinized and rehydrated, before antigen retrieval using citrate buffer. Sections were  
452 incubated overnight at 4°C with rabbit anti-insulin 1:500 (Cell Signaling, 3014S) and mouse  
453 anti-glucagon 1:2000 (Sigma-Aldrich, G 2654) followed by washing and application of goat  
454 anti-rabbit Alexa Fluor 647 1:500 (ThermoFisher Scientific, A-21244) and goat anti mouse  
455 DyLight 488 1:500 (Invitrogen, 35503). Coverslips were mounted using VECTASHIELD  
456 HardSet with Dapi and 425 images per section captured using a Zeiss Axio Scan.Z1  
457 automated slide scanner equipped with a 20 x / 0.8 NA objective.  $\beta$ -cell mass (%) was  
458 calculated as the area of insulin + staining/area of the pancreas. Excitation was delivered at  $\lambda$   
459 = 330-375 nm and  $\lambda$  = 590-650 nm for DAPI and Alexa Fluor 647, respectively. Emitted signals  
460 were detected using an Orca Flash 4.0 at  $\lambda$  = 430-470 nm and  $\lambda$  = 663-738 nm for DAPI and  
461 Alexa Fluor 647, respectively.

462 TUNEL staining was performed using the DeadEnd Fluorometric TUNEL System (Promega),  
463 as previously described (60). The proportion of apoptotic  $\beta$ -cells was calculated as the area  
464 of TUNEL+ staining (fluorescein-12-dUTP)/area of insulin+ staining (as above).  $\alpha$ -cell/  $\beta$ -cell  
465 ratio was calculated following staining with antibodies against insulin (as above) and glucagon  
466 (primary antibody: mouse anti-glucagon 1:2000; Sigma-Aldrich, G2645) (secondary antibody  
467 goat anti-mouse Alexa Fluor 488 1:500; ThermoFisher Scientific, A11001). Images were  
468 captured using a Zeiss LSM780 meta-confocal microscope equipped with highly-sensitive  
469 GaAsP PMT detectors. Excitation was delivered at  $\lambda$  = 405 nm,  $\lambda$  = 488 nm and  $\lambda$  = 633 nm  
470 for DAPI, fluorescein-12-dUTP/Alexa Fluor 488 and Alexa Fluor 647 nm, respectively. Emitted  
471 signals were detected at  $\lambda$  = 428-533 nm,  $\lambda$  = 498-559 nm and  $\lambda$  = 643-735 nm for DAPI,  
472 fluorescein-12-dUTP/Alexa Fluor 488 and Alexa Fluor 633 nm, respectively.

#### 473 **Insulin secretion *in vitro* and insulin measurement**

474 Ten to fifteen size-matched islets were stimulated with: 3 mM glucose, 16.7 mM glucose and  
475 16.7 mM glucose + 10 nM Exendin-4 in HEPES-bicarbonate buffer (mM: 120 NaCl, 4.8 KCl,  
476 24 NaHCO<sub>3</sub>, 0.5 Na<sub>2</sub>HPO<sub>4</sub>, 5 HEPES, 2.5 CaCl<sub>2</sub>, 1.2 MgCl<sub>2</sub>) supplemented with 0.1% BSA at  
477 37°C. Insulin content was extracted using acid ethanol. Insulin concentration (ng/ml) was  
478 measured using a HTRF Insulin Ultra-Sensitive Assay kit (Cisbio, France).

#### 479 **Live imaging**

480 Islets were loaded with the Ca<sup>2+</sup> indicators Fluo8 or Fura2 (both AAT Bioquest), before imaging  
481 using a Crest X-Light spinning disk microscope coupled to a Nikon Ti-E base with 10 x 0.4 NA  
482 and 20 x 0.8 NA objectives. For Fluo8 imaging, excitation was delivered at and  $\lambda$  = 458-482  
483 nm using a Lumencor Spectra X light engine. Emission was captured at  $\lambda$  = 500-550 nm using  
484 a highly-sensitive Photometrics Delta Evolve EM-CCD. For experiments with the ratiometric  
485 Ca<sup>2+</sup> indicator, Fura2, excitation was delivered at  $\lambda$  = 340 nm and  $\lambda$  = 385 nm using Cairn  
486 Research Fura LEDs in widefield mode, with emitted signals detected at  $\lambda$  = 470-550 nm.

487 For ATP/ADP imaging, islets were transduced with the ATP/ADP sensor Perceval (a kind gift  
488 from Prof Gary Yellen, Harvard) (61) using an adenoviral vector and imaged identically to  
489 Fluo8. For FRET-based cAMP imaging, islets were infected with adenovirus harboring Epac2-  
490 camps (a kind gift from Prof Dermot Cooper, Cambridge). Excitation was delivered at 430–  
491 450 nm, with emission detected at and  $\lambda = 460\text{--}500$  and and  $\lambda = 520\text{--}550$  nm for Cerulean  
492 and Citrine, respectively.

493 In all cases, HEPES-bicarbonate buffer was used (mM: 120 NaCl, 4.8 KCl, 24 NaHCO<sub>3</sub>, 0.5  
494 Na<sub>2</sub>HPO<sub>4</sub>, 5 HEPES, 2.5 CaCl<sub>2</sub>, 1.2 MgCl<sub>2</sub>, and 3–17 D-glucose), with glucose and drugs  
495 being added at the indicated concentrations and timepoints. Fura2 and Epac2-camps traces  
496 were normalized as the ratio of 340/385 or Cerulean/Citrine, respectively. Data were  
497 presented as raw or  $F/F_{\min}$  where  $F$  = fluorescence at any timepoint and  $F_{\min}$  = minimum  
498 fluorescence, or  $R/R_0$  where  $R$  = fluorescence at any timepoint and  $R_0$  = fluorescence at 0  
499 mins.

### 500 **Glucose oxidation assays and metabolic tracing**

501 <sup>14</sup>C glucose oxidation and lipid incorporation: batches of 40 islets were used for quantification  
502 of glucose oxidation and incorporation into lipids by scintillation spectrometry, as previously  
503 described (44).

504 Gas chromatography–mass spectrometry (GC-MS)-based <sup>13</sup>C<sub>6</sub> mass isotopomer distribution:  
505 To ensure steady state, 50-100 islets were cultured with 10 mM <sup>13</sup>C<sub>6</sub>-glucose for 24 hours  
506 (62), before extraction of metabolites using sequentially pre-chilled HPLC-grade methanol,  
507 HPLC-grade distilled H<sub>2</sub>O containing 1 µg/mL D6-glutaric acid and HPLC-grade chloroform at  
508 -20 °C. Polar fractions were separated by centrifugation, vacuum dried and solubilized in 2%  
509 methoxyamine hydrochloric acid in pyridine. Samples were derivatized using N-  
510 tertbutyldimethylsilyl-N-methyltrifluoroacetamide (MTBSTFA) with 1% (w/v) tertbutyldimethyl-  
511 chlorosilane (TBDMCS), before analysis on an Agilent 7890B gas chromatograph mass  
512 spectrometer, equipped with a medium polar range polydimethylsiloxane GC column (DB35-  
513 MS). Mass isotopomer distributions (MIDs) were determined based upon spectra corrected  
514 for natural isotope abundance. Data were analyzed using MetaboliteDetector software (63).

### 515 **Statistics**

516 Measurements were performed on discrete samples unless otherwise stated. Data normality  
517 was assessed using D'Agostino-Person test. All analyses were conducted using GraphPad  
518 Prism software. Pairwise comparisons were made using Student's unpaired or paired t-test,  
519 or Mann-Whitney test. Multiple interactions were determined using either Kruskal-Wallis test,  
520 one-way ANOVA or two-way ANOVA followed by Tukey's, Dunn's, Dunnett's, Bonferonni's or  
521 Sidak's post-hoc tests (accounting for degrees of freedom).

### 522 **Data availability**

523 The datasets generated and/or analyzed during the current study are available from the  
524 corresponding author upon reasonable request.

525 REFERENCES

- 526 1. R. K. Bruick, Oxygen sensing in the hypoxic response pathway: regulation of the  
527 hypoxia-inducible transcription factor. *Genes Dev.* **17**, 2614-2623 (2003).
- 528 2. C. J. Schofield, P. J. Ratcliffe, Oxygen sensing by HIF hydroxylases. *Nat. Rev. Mol.*  
529 *Cell Biol.* **5**, 343-354 (2004).
- 530 3. R. K. Bruick, S. L. McKnight, A conserved family of prolyl-4-hydroxylases that modify  
531 HIF. *Science* **294**, 1337-1340 (2001).
- 532 4. A. C. Epstein *et al.*, *C. elegans* EGL-9 and mammalian homologs define a family of  
533 dioxygenases that regulate HIF by prolyl hydroxylation. *Cell* **107**, 43-54 (2001).
- 534 5. W. G. Kaelin, Jr., P. J. Ratcliffe, Oxygen sensing by metazoans: the central role of  
535 the HIF hydroxylase pathway. *Mol. Cell* **30**, 393-402 (2008).
- 536 6. D. A. Chan *et al.*, Tumor vasculature is regulated by PHD2-mediated angiogenesis  
537 and bone marrow-derived cell recruitment. *Cancer Cell* **15**, 527-538 (2009).
- 538 7. R. V. Duran *et al.*, HIF-independent role of prolyl hydroxylases in the cellular  
539 response to amino acids. *Oncogene* **32**, 4549-4556 (2013).
- 540 8. W. Luo *et al.*, Pyruvate kinase M2 is a PHD3-stimulated coactivator for hypoxia-  
541 inducible factor 1. *Cell* **145**, 732-744 (2011).
- 542 9. A. T. Henze *et al.*, Loss of PHD3 allows tumours to overcome hypoxic growth  
543 inhibition and sustain proliferation through EGFR. *Nat. Commun.* **5**, 5582 (2014).
- 544 10. R. J. Appelhoff *et al.*, Differential Function of the Prolyl Hydroxylases PHD1, PHD2,  
545 and PHD3 in the Regulation of Hypoxia-inducible Factor. *J. Biol. Chem.* **279**, 38458-  
546 38465 (2004).
- 547 11. E. Berra *et al.*, HIF prolyl-hydroxylase 2 is the key oxygen sensor setting low steady-  
548 state levels of HIF-1 $\alpha$  in normoxia. *EMBO J* **22**, 4082-4090 (2003).
- 549 12. D. A. Tennant *et al.*, Reactivating HIF prolyl hydroxylases under hypoxia results in  
550 metabolic catastrophe and cell death. *Oncogene* **28**, 4009-4021 (2009).
- 551 13. J. Kiss *et al.*, Loss of the oxygen sensor PHD3 enhances the innate immune  
552 response to abdominal sepsis. *J. Immunol.* **189**, 1955-1965 (2012).
- 553 14. S. R. Walmsley *et al.*, Prolyl hydroxylase 3 (PHD3) is essential for hypoxic regulation  
554 of neutrophilic inflammation in humans and mice. *J. Clin. Invest.* **121**, 1053-1063  
555 (2011).
- 556 15. Y. Su *et al.*, PHD3 regulates differentiation, tumour growth and angiogenesis in  
557 pancreatic cancer. *Br. J. Cancer* **103**, 1571-1579 (2010).
- 558 16. S. Schlisio *et al.*, The kinesin KIF1B $\beta$  acts downstream from EglN3 to induce  
559 apoptosis and is a potential 1p36 tumor suppressor. *Genes Dev.* **22**, 884-893 (2008).
- 560 17. T. L. Place, F. E. Domann, Prolyl-hydroxylase 3: Evolving Roles for an Ancient  
561 Signaling Protein. *Hypoxia (Auckl)* **2013**, 13-17 (2013).
- 562 18. D. A. Tennant, E. Gottlieb, HIF prolyl hydroxylase-3 mediates alpha-ketoglutarate-  
563 induced apoptosis and tumor suppression. *J. Mol. Med.* **88**, 839-849 (2010).
- 564 19. H. Boulahbel, Raúl V. Durán, E. Gottlieb, Prolyl hydroxylases as regulators of cell  
565 metabolism: Figure 1. *Biochem. Soc. Trans.* **37**, 291-294 (2009).
- 566 20. N. Chen *et al.*, The oxygen sensor PHD3 limits glycolysis under hypoxia via direct  
567 binding to pyruvate kinase. *Cell Res.* **21**, 983-986 (2011).
- 568 21. S. Lee *et al.*, Neuronal apoptosis linked to EglN3 prolyl hydroxylase and familial  
569 pheochromocytoma genes: Developmental culling and cancer. *Cancer Cell* **8**, 155-  
570 167 (2005).
- 571 22. L. Dang *et al.*, Cancer-associated IDH1 mutations produce 2-hydroxyglutarate.  
572 *Nature* **462**, 739-744 (2009).
- 573 23. I. P. Tomlinson *et al.*, Germline mutations in FH predispose to dominantly inherited  
574 uterine fibroids, skin leiomyomata and papillary renal cell cancer. *Nat Genet* **30**, 406-  
575 410 (2002).
- 576 24. N. J. German *et al.*, PHD3 Loss in Cancer Enables Metabolic Reliance on Fatty Acid  
577 Oxidation via Deactivation of ACC2. *Mol. Cell* **63**, 1006-1020 (2016).



- 578 25. C. M. Taniguchi *et al.*, Cross-talk between hypoxia and insulin signaling through  
579 Phd3 regulates hepatic glucose and lipid metabolism and ameliorates diabetes. *Nat.*  
580 *Med.* **19**, 1325-1330 (2013).
- 581 26. H. Yano *et al.*, PHD3 regulates glucose metabolism by suppressing stress-induced  
582 signalling and optimising gluconeogenesis and insulin signalling in hepatocytes.  
583 *Scientific Reports* **8** (2018).
- 584 27. M. Huang *et al.*, Role of prolyl hydroxylase domain proteins in the regulation of  
585 insulin secretion. *Physiological Reports* **4**, e12722 (2016).
- 586 28. A. De Vos *et al.*, Human and rat beta cells differ in glucose transporter but not in  
587 glucokinase gene expression. *J. Clin. Invest.* **96**, 2489-2495 (1995).
- 588 29. M. S. German, Glucose sensing in pancreatic islet beta cells: the key role of  
589 glucokinase and the glycolytic intermediates. *Proc. Natl. Acad. Sci. U. S. A.* **90**, 1781-  
590 1785 (1993).
- 591 30. G. A. Rutter, T. J. Pullen, D. J. Hodson, A. Martinez-Sanchez, Pancreatic beta-cell  
592 identity, glucose sensing and the control of insulin secretion. *Biochem. J.* **466**, 203-  
593 218 (2015).
- 594 31. T. J. Pullen, G. A. Rutter, When less is more: the forbidden fruits of gene repression  
595 in the adult beta-cell. *Diabetes Obes. Metab.* **15**, 503-512 (2013).
- 596 32. K. Lemaire, L. Thorrez, F. Schuit, Disallowed and Allowed Gene Expression: Two  
597 Faces of Mature Islet Beta Cells. *Annu. Rev. Nutr.* **36**, 45-71 (2016).
- 598 33. B. Thorens *et al.*, Ins1 knock-in mice for beta cell-specific gene recombination.  
599 *Diabetologia* **58**, 558-565 (2014).
- 600 34. K. Takeda *et al.*, Placental but Not Heart Defects Are Associated with Elevated  
601 Hypoxia-Inducible Factor  $\alpha$  Levels in Mice Lacking Prolyl Hydroxylase Domain  
602 Protein 2. *Mol. Cell. Biol.* **26**, 8336-8346 (2006).
- 603 35. D. M. Blodgett *et al.*, Novel Observations From Next-Generation RNA Sequencing of  
604 Highly Purified Human Adult and Fetal Islet Cell Subsets. *Diabetes* **64**, 3172-3181  
605 (2015).
- 606 36. C. Benner *et al.*, The transcriptional landscape of mouse beta cells compared to  
607 human beta cells reveals notable species differences in long non-coding RNA and  
608 protein-coding gene expression. *BMC Genomics* **15** (2014).
- 609 37. H. Komatsu *et al.*, Oxygen environment and islet size are the primary limiting factors  
610 of isolated pancreatic islet survival. *PLoS ONE* **12**, e0183780 (2017).
- 611 38. J. Cantley *et al.*, Deletion of the von Hippel–Lindau gene in pancreatic  $\beta$  cells impairs  
612 glucose homeostasis in mice. *J. Clin. Invest.* 10.1172/jci26934 (2008).
- 613 39. M. A. Nauck *et al.*, Incretin effects of increasing glucose loads in man calculated from  
614 venous insulin and C-peptide responses. *J. Clin. Endocrinol. Metab.* **63**, 492-498  
615 (1986).
- 616 40. J. Cantley, S. T. Grey, P. H. Maxwell, D. J. Withers, The hypoxia response pathway  
617 and  $\beta$ -cell function. *Diabetes Obes. Metab.* **12**, 159-167 (2010).
- 618 41. F. Dayan, D. Roux, M. C. Brahimi-Horn, J. Pouyssegur, N. M. Mazure, The oxygen  
619 sensor factor-inhibiting hypoxia-inducible factor-1 controls expression of distinct  
620 genes through the bifunctional transcriptional character of hypoxia-inducible factor-  
621 1 $\alpha$ . *Cancer Res* **66**, 3688-3698 (2006).
- 622 42. G. da Silva Xavier, D. J. Hodson, Mouse models of peripheral metabolic disease.  
623 *Best Practice & Research Clinical Endocrinology & Metabolism*  
624 10.1016/j.beem.2018.03.009 (2018).
- 625 43. N. M. Templeman *et al.*, Reduced Circulating Insulin Enhances Insulin Sensitivity in  
626 Old Mice and Extends Lifespan. *Cell Reports* **20**, 451-463 (2017).
- 627 44. J. Cantley *et al.*, Disruption of beta cell acetyl-CoA carboxylase-1 in mice impairs  
628 insulin secretion and beta cell mass. *Diabetologia* **62**, 99-111 (2018).
- 629 45. S. M. Ronnebaum *et al.*, Chronic Suppression of Acetyl-CoA Carboxylase 1 in  $\beta$ -  
630 Cells Impairs Insulin Secretion via Inhibition of Glucose Rather Than Lipid  
631 Metabolism. *J. Biol. Chem.* **283**, 14248-14256 (2008).

- 632 46. M. J. MacDonald, A. Dobrzyn, J. Ntambi, S. W. Stoker, The role of rapid lipogenesis  
633 in insulin secretion: Insulin secretagogues acutely alter lipid composition of INS-1  
634 832/13 cells. *Arch. Biochem. Biophys.* **470**, 153-162 (2008).
- 635 47. S. Hrvatin *et al.*, Differentiated human stem cells resemble fetal, not adult,  $\beta$  cells.  
636 *Proceedings of the National Academy of Sciences* **111**, 3038-3043 (2014).
- 637 48. I. Moran *et al.*, Human beta Cell Transcriptome Analysis Uncovers lncRNAs That Are  
638 Tissue-Specific, Dynamically Regulated, and Abnormally Expressed in Type 2  
639 Diabetes. *Cell Metab.* **16**, 435-448 (2012).
- 640 49. B. Raud *et al.*, Etomoxir Actions on Regulatory and Memory T Cells Are Independent  
641 of Cpt1a-Mediated Fatty Acid Oxidation. *Cell Metab.* **28**, 504-515.e507 (2018).
- 642 50. M. E. Cockman *et al.*, Lack of activity of recombinant HIF prolyl hydroxylases (PHDs)  
643 on reported non-HIF substrates. *eLife* **8** (2019).
- 644 51. M. Cnop *et al.*, RNA Sequencing Identifies Dysregulation of the Human Pancreatic  
645 Islet Transcriptome by the Saturated Fatty Acid Palmitate. *Diabetes* **63**, 1978-1993  
646 (2014).
- 647 52. D. A. Cunha *et al.*, Initiation and execution of lipotoxic ER stress in pancreatic beta-  
648 cells. *J. Cell Sci.* **121**, 2308-2318 (2008).
- 649 53. C. M. Taniguchi *et al.*, Cross-talk between hypoxia and insulin signaling through  
650 Phd3 regulates hepatic glucose and lipid metabolism and ameliorates diabetes. *Nat*  
651 *Med* **19**, 1325-1330 (2013).
- 652 54. T. Bishop *et al.*, Abnormal sympathoadrenal development and systemic hypotension  
653 in PHD3<sup>-/-</sup> mice. *Mol Cell Biol* **28**, 3386-3400 (2008).
- 654 55. X.-g. Cui *et al.*, HIF1/2 $\alpha$ ; mediates hypoxia-induced LDHA expression in  
655 human pancreatic cancer cells. *Oncotarget* **8** (2017).
- 656 56. G. Ghenni *et al.*, Glutamate Acts as a Key Signal Linking Glucose Metabolism to  
657 Incretin/cAMP Action to Amplify Insulin Secretion. *Cell Reports* **9**, 661-673 (2014).
- 658 57. Natalie R. Johnston *et al.*, Beta Cell Hubs Dictate Pancreatic Islet Responses  
659 to Glucose. *Cell Metab.* **24**, 389-401 (2016).
- 660 58. M. L. Golson *et al.*, Ins1-Cre and Ins1-CreER gene replacement alleles are  
661 susceptible to silencing by DNA hypermethylation. *Endocrinology*  
662 10.1210/endocr/bqaa054 (2020).
- 663 59. J. Ast *et al.*, Super-resolution microscopy compatible fluorescent probes reveal  
664 endogenous glucagon-like peptide-1 receptor distribution and dynamics. *Nat.*  
665 *Commun.* **11** (2020).
- 666 60. D. J. Hodson *et al.*, ADCY5 couples glucose to insulin secretion in human islets.  
667 *Diabetes* **63**, 3009-3021 (2014).
- 668 61. J. Berg, Y. P. Hung, G. Yellen, A genetically encoded fluorescent reporter of  
669 ATP:ADP ratio. *Nat. Methods* **6**, 161-166 (2009).
- 670 62. M. Wortham *et al.*, Integrated In Vivo Quantitative Proteomics and Nutrient Tracing  
671 Reveals Age-Related Metabolic Rewiring of Pancreatic  $\beta$  Cell Function. *Cell Reports*  
672 **25**, 2904-2918.e2908 (2018).
- 673 63. K. Hiller *et al.*, MetaboliteDetector: Comprehensive Analysis Tool for Targeted and  
674 Nontargeted GC/MS Based Metabolome Analysis. *Anal. Chem.* **81**, 3429-3439  
675 (2009).

676

677 **ACKNOWLEDGEMENTS**

678 D.J.H. was supported by a Diabetes UK R.D. Lawrence (12/0004431) Fellowship, a Wellcome  
679 Trust Institutional Support Award, and MRC (MR/N00275X/1 and MR/S025618/1) and  
680 Diabetes UK (17/0005681) Project Grants. D.T. was supported by Cancer Research UK  
681 Grants (C42109/A26982 and C42109/A24891). This project has received funding from the  
682 European Research Council (ERC) under the European Union's Horizon 2020 research and  
683 innovation programme (Starting Grant 715884 to D.J.H.). We thank Dr Mathew Coleman  
684 (University of Birmingham) for useful discussions.

685 **AUTHOR CONTRIBUTIONS**

686 D.N., F.C., R.B.B., R.W., and J.C. performed experiments and analyzed data. F.C. and A.T.  
687 ran and analyzed samples for GC-MS. I.A. analyzed data. D.T. and D.J.H. conceived,  
688 designed and supervised the studies. D.J.H. and D.T. wrote the paper with input from all  
689 authors.

690 **CONFLICT OF INTEREST STATEMENT**

691  
692 The authors have declared that no conflict of interest exists.

## 693 FIGURE LEGENDS

694 **Figure 1: Generation and validation of mice lacking PHD3 in pancreatic  $\beta$ -cells.** (A) *Egln3*  
695 expression is reduced in islets of  $\beta$ PHD3KO mice versus control ( $\beta$ PHD3CON) littermates (n  
696 = 8 animals) (paired t-test). (B) Western blot analyses showing decreased PHD3 expression  
697 in  $\beta$ PHD3KO mice (n = 100-150 islets from 3 animals run on the same gel) (paired t-test). (C)  
698 *Egln3* expression is highly upregulated following exposure of islets to hypoxic (1% O<sub>2</sub>)  
699 conditions for 24 hrs (n = 3 animals) (paired t-test). (D-F) Expression of the HIF1 $\alpha$ -target genes  
700 *Bnip* (D), *Car9* (E) or *Gls* (F), is similar or decreased in  $\beta$ PHD3KO versus  $\beta$ PHD3CON islets  
701 exposed to normoxia (21% O<sub>2</sub>) or hypoxia (1% O<sub>2</sub>) 24 hrs (n = 4 animals) (Kruskal-Wallis test  
702 Dunn's multiple comparison test) (G and H) Glucose- (G) and KCl- (H) stimulated Ca<sup>2+</sup> fluxes  
703 are not significantly different in  $\beta$ PHD3KO versus  $\beta$ PHD3CON islets exposed to normoxia or  
704 hypoxia (n = 11-27 islets, 2 animals/genotype) (two-way ANOVA; Sidak's multiple comparison  
705 test). (I and J) Mean Ca<sup>2+</sup> traces from  $\beta$ PHD3CON (I) and  $\beta$ PHD3KO (J) islets exposed to  
706 normoxia or hypoxia. Bar graphs show scatter plot with mean  $\pm$  SEM. Line graphs show mean  
707  $\pm$  SEM. \*P<0.05, \*\*P<0.01 and NS, non-significant. PHD3, prolyl-hydroxylase 3.

708

709 **Figure 2:  $\beta$ PHD3KO *in vivo* phenotype under standard chow conditions.** (A and B) Male  
710 (A) and female (B)  $\beta$ PHD3CON and  $\beta$ PHD3KO mice possess similar growth curves and adult  
711 body weight (n = 8-10 male and 15 female animals/genotype) (two-way repeated measures  
712 ANOVA; Sidak's multiple comparison test). (C and D) No differences in intraperitoneal glucose  
713 tolerance are detected between  $\beta$ PHD3CON and  $\beta$ PHD3KO male (n = 13 animals/genotype)  
714 (C) and female (n = 10 animals/genotype) (D) 8-week-old mice (two-way repeated measures  
715 ANOVA; Sidak's multiple comparison test). (E and F) No differences in intraperitoneal glucose  
716 tolerance are detected between  $\beta$ PHD3CON and  $\beta$ PHD3KO male (E) and female (F) 20-  
717 week-old mice (two-way repeated measures ANOVA; Sidak's multiple comparison test) (n =  
718 8-16 male and 8 female animals/genotype). (G) Insulin sensitivity is similar in  $\beta$ PHD3CON and  
719  $\beta$ PHD3KO mice (n = 5-6 animals/genotype) (two-way repeated measures ANOVA; Sidak's  
720 multiple comparison test). (H-J) Cell resolution reconstruction of entire pancreatic sections  
721 shows no differences in islet size and  $\beta$ -cell mass between  $\beta$ PHD3CON and  $\beta$ PHD3KO mice.  
722 Quantification is shown in (H and I), with representative images in (J) (scale bar = 530  $\mu$ m)  
723 (inset is a zoom showing maintenance of cellular resolution in a single image) (n = 3  
724 animals/genotype) (unpaired t-test). Bar graphs show scatter plot with mean  $\pm$  SEM. Line  
725 graphs show mean  $\pm$  SEM. \*P<0.05, \*\*P<0.01 and NS, non-significant. PHD3, prolyl-  
726 hydroxylase 3.

727

728 **Figure 3:  $\beta$ PHD3KO *in vitro* phenotype under standard chow conditions.** (A-C)  
729 Expression of the  $\beta$ -cell maturity markers *Pdx1* (A), *Mafa* (B) and *Nkx6-1* (C) is similar in  
730  $\beta$ PHD3CON and  $\beta$ PHD3KO islets (n = 6-7 animals) (paired t-test). (D and E) Glucose-  
731 stimulated ATP/ADP rises do not differ in islets of  $\beta$ PHD3CON and  $\beta$ PHD3KO mice, as shown  
732 by mean traces (D) and summary bar graph (E) (representative images shown above each  
733 bar; a single islet has been cropped for clarity) (n = 38-40 islets, 4-5 animals/genotype)  
734 (unpaired t-test). (F and G) Glucose- and KCl-stimulated Ca<sup>2+</sup> rises do not differ in islets of  
735  $\beta$ PHD3CON and  $\beta$ PHD3KO mice, as shown by mean traces (F), as well as summary bar  
736 graph (G) (n = 22-26 islets, 2 animals/genotype) (two-way ANOVA; Sidak's multiple

737 comparison test). (H) Insulin secretory responses to Exendin-4 (Ex4), but not glucose, are  
738 impaired in  $\beta$ PHD3KO islets (n = 12 replicates from 3 animals/genotype) (two-way ANOVA;  
739 Bonferonni's multiple comparison test). (I) *Glp1r* expression is similar in  $\beta$ PHD3CON and  
740  $\beta$ PHD3KO islets (n = 4 animals/genotype) (paired t-test). (J and K) cAMP responses to Ex4  
741 do not differ between  $\beta$ PHD3CON and  $\beta$ PHD3KO islets, as shown by mean traces and  
742 summary bar graph (representative images shown; a single islet has been cropped for clarity)  
743 (n = 50 islets from 4-5 animals/genotype) (unpaired t-test). (L) Oral glucose tolerance is almost  
744 identical in  $\beta$ PHD3CON and  $\beta$ PHD3KO mice (n = 4 animals/genotype) (two-way repeated  
745 measures ANOVA; Sidak's multiple comparison test). Bar graphs show scatter plot with mean  
746  $\pm$  SEM. Line graphs show mean  $\pm$  SEM. \*P<0.05, \*\*P<0.01 and NS, non-significant. Exendin-  
747 4, Ex4; PHD3, prolyl-hydroxylase 3; G3, 3 mM glucose; G11, 11 mM glucose; G16.7, 16.7 mM  
748 glucose; G17, 17 mM glucose.

749

750 **Figure 4:  $\beta$ PHD3KO *in vivo* and *in vitro* phenotype during metabolic stress.** (A) *Egln3*  
751 expression is upregulated in 4 weeks HFD  $\beta$ PHD3CON, but not  $\beta$ PHD3KO islets (n = 3  
752 animals/genotype) (one-way ANOVA; Sidak's multiple comparison test). (B and C) Glucose  
753 tolerance in male  $\beta$ PHD3KO mice is unaffected by 72 hrs HFD (n = 5 animals/genotype), but  
754 is markedly impaired by 4 weeks HFD (C) (n = 8-11 animals/genotype) (two-way repeated  
755 measures ANOVA; Sidak's multiple comparison test). (D) Growth curves and adult body  
756 weight are similar in male  $\beta$ PHD3CON and  $\beta$ PHD3KO animals fed HFD (n = 11-12  
757 animals/genotype) (two-way repeated measures ANOVA; Sidak's multiple comparison test).  
758 (E) Fasting blood glucose levels are significantly higher in male  $\beta$ PHD3CON after 4 weeks  
759 versus 72 hrs HFD (n = 5-8 animals) (unpaired t-test). (F) Glucose tolerance is unaffected in  
760 male *Cre*- and *Egln3<sup>fl/fl</sup>*-only controls (n = 10-13 animals/genotype) (two-way repeated  
761 measures ANOVA; Tukey's multiple comparison test). (G) Insulin secretory responses to  
762 intraperitoneal glucose are higher in fasted male  $\beta$ PHD3KO mice versus  $\beta$ PHD3CON  
763 littermates fed HFD for 4 weeks (n = 6-13 animals/genotype) (two-way repeated measures  
764 ANOVA; Sidak's multiple comparison test). (H-J) Cell resolution reconstruction of entire  
765 pancreatic sections shows a 2-fold increase in  $\beta$ -cell mass, with a shift toward larger islets, in  
766  $\beta$ PHD3KO compared to  $\beta$ PHD3CON mice following 4 weeks HFD. Representative images are  
767 shown in (H), with quantification in (I and J) (scale bar = 530  $\mu$ m) (inset is a zoom showing  
768 maintenance of cellular resolution in a single image) (unpaired t-test) (n = 3  
769 animals/genotype). (K) Glucose- and Exendin-4-stimulated insulin secretion is increased in  
770 islets from 4 weeks HFD  $\beta$ PHD3KO mice (n = 20 replicates from 4 animals/genotype) (two-  
771 way ANOVA; Bonferonni's multiple comparison test). (L-N) Expression of the HIF1 $\alpha$ -target  
772 genes *Gls* (L), *Bnip3* (M) and *Car9* (N) is either unchanged or decreased in 4 weeks HFD  
773  $\beta$ PHD3KO islets (n = 3-4 animals/genotype) (paired t-test). Bar graphs show scatter plot with  
774 mean  $\pm$  SEM. Line graphs show mean  $\pm$  SEM. \*P<0.05, \*\*P<0.01 and NS, non-significant.  
775 PHD3, prolyl-hydroxylase 3; Exendin-4, Ex4; G3, 3 mM glucose; G16.7, 16.7 mM glucose.

776

777 **Figure 5: Metabolic rewiring in  $\beta$ PHD3KO islets during metabolic stress.** (A-C)  $\beta$ PHD3KO  
778 islets possess intact glucose oxidation (A), but impaired accumulation of glycolytic/TCA cycle  
779 metabolites (B) and glucose-driven lipogenesis (C) following 4 weeks of HFD (n = 3 islet  
780 preparations from 3 animals/genotype) (two-way ANOVA, Fisher LSD). (D-H) Mass  
781 isotopomer distribution (MID) showing that  $^{13}\text{C}_6$  incorporation from glucose into aspartate (D),

782 glutamate (E), malate (F), fumarate (G) or citrate (H) is similar in  $\beta$ PHD3CON and  $\beta$ PHD3KO  
783 islets isolated from mice fed SC or HFD (n = 3 replicates from 6 animals/genotype) (two-way  
784 ANOVA, Tukey's multiple comparison test). (I)  $^{13}\text{C}_6$  glucose is incorporated primarily into m+2  
785 lactate in SC  $\beta$ PHD3CON and  $\beta$ PHD3KO islets, whereas a shift to m+3 lactate is seen during  
786 4 weeks HFD (n = 3 replicates from 3-6 animals/genotype) (two-way ANOVA, Tukey's multiple  
787 comparison test). (J) Steady-state lactate levels are increased in  $\beta$ PHD3KO versus  
788  $\beta$ PHD3CON islets following 4 weeks HFD (n = 3 animals/genotype) (one-way ANOVA,  
789 Bonferroni's multiple comparison test). (K) Schematic showing fate of  $^{13}\text{C}_6$  glucose in  
790  $\beta$ PHD3KO islets. (L) *Ldha* expression is similar in both SC and HFD  $\beta$ PHD3KO and  
791  $\beta$ PHD3CON islets (n = 4 animals/genotype) (paired t-test). Bar graphs show mean  $\pm$  SEM.  
792 \*P<0.05, \*\*P<0.01 and NS, non-significant. PHD3, prolyl-hydroxylase 3; *Ldha*, gene lactate  
793 dehydrogenase A.

794

795 **Figure 6: Nutrient preference is altered in  $\beta$ PHD3KO islets during metabolic stress.** (A)  
796 Incubation of 4 weeks HFD  $\beta$ PHD3KO islets for 48 hrs with exogenous palmitate leads to  
797 enhanced glucose- and Exendin-4-stimulated insulin secretion (n = 12-17 replicates from 4  
798 animals/genotype) (two-way ANOVA, Fisher LSD). (B) As for (A), but 4 weeks HFD  
799  $\beta$ PHD3CON islets showing no changes in glucose-stimulated insulin secretion, but an  
800 increase in responses to Exendin-4 (n = 13-17 replicates from 4 animals/genotype) (two-way  
801 ANOVA, Fisher LSD). (C-E) Glucose-stimulated ATP/ADP rises are impaired in 4 weeks HFD  
802  $\beta$ PHD3KO islets, as shown by mean traces (C), representative images (a single islet has been  
803 cropped for clarity) (D) and summary bar graph (E) (n = 13-15 islets from 4 animals/genotype)  
804 (unpaired t-test). (F and G) Glucose- and KCl-stimulated  $\text{Ca}^{2+}$  rises are similar (glucose) or  
805 increased (KCl) in  $\beta$ PHD3CON and  $\beta$ PHD3KO islets following 4 weeks HFD, as shown by  
806 mean traces (F) and summary bar graph (G) (n = 26-33 islets from 3 animals/genotype) (two-  
807 way measures ANOVA; Sidak's multiple comparison test). (H) *Cpt1a* expression tends to be  
808 increased in 4 weeks HFD  $\beta$ PHD3KO islets (n = 4 animals/genotype) (paired t-test). (I)  
809 Inhibition of CPT1 using etomoxir (ETX) increases the amplitude of glucose-stimulated  
810 ATP/ADP ratio in 4 weeks HFD  $\beta$ PHD3KO islets (representative images shown above each  
811 bar; a single islet has been cropped for clarity) (n = 18 islets from 2 animals/genotype) (two-  
812 way measures ANOVA; Sidak's multiple comparison test). (J and K)  $\text{Ca}^{2+}$  responses to  
813 glucose are impaired in 4 weeks HFD  $\beta$ PHD3KO islets, but not 4 weeks HFD  $\beta$ PHD3CON  
814 islets, following 48 hrs incubation with the free fatty acid palmitate (palm) (150  $\mu\text{M}$ ), as shown  
815 by mean traces (J) and summary bar graphs (K) (n = 12-15 islets from 2-3 animals/genotype)  
816 (unpaired t-test). (L) Schematic showing proposed effects of PHD3 deletion on  $\beta$ -cell  
817 metabolism under HFD. Bar graphs show scatter plot with mean  $\pm$  SEM. Line graphs show  
818 mean  $\pm$  SEM. \*P<0.05, \*\*P<0.01 and NS, non-significant. PHD3, prolyl-hydroxylase 3; *Cpt1a*,  
819 carnitine palmitoyltransferase 1A; Exendin-4, Ex4; G3, 3 mM glucose; G16.7, 16.7 mM  
820 glucose; G17, 17 mM glucose; BSA, bovine serum albumin; Palm, palmitate.

821

822 **Figure 7: Prolonged metabolic stress induces failure in  $\beta$ PHD3KO islets.** (A) *ACACB* is  
823 expressed in human islets and purified  $\beta$ -cells but levels are lower than *ACACA* (data were  
824 obtained from (35, 47, 48)). (B) The *ACACB* promoter is regulated by multiple  $\beta$ -cell  
825 transcription factors, with the presence of an antisense transcribed long non-coding RNA (  
826 detected data were also obtained from (35, 47, 48)). (C and D) Expression levels of *Acaca* (C)

827 and *Acacb* (D) are not significantly different in  $\beta$ PHD3KO versus  $\beta$ PHD3CON islets following  
828 HFD (n = 6 animals) (paired t-test). (E) Glucose tolerance in  $\beta$ PHD3KO mice is still impaired  
829 versus  $\beta$ PHD3CON littermates after 8 weeks HFD (n = 9-11 animals/genotype) (two-way  
830 repeated measures ANOVA; Sidak's multiple comparison test). (F) Insulin sensitivity is similar  
831 in 8 weeks HFD  $\beta$ PHD3CON and  $\beta$ PHD3KO mice (n = 5 animals/genotype) (two-way repeated  
832 measures ANOVA; Sidak's multiple comparison test). (G) By 8 weeks of HFD, glucose-  
833 stimulated insulin secretion is impaired in  $\beta$ PHD3KO versus  $\beta$ PHD3CON islets. Note that  
834 Exendin-4 rescues the apparent secretory defect in  $\beta$ PHD3KO islets (n = 29-32 replicates  
835 from 4 animals/genotype) (two-way ANOVA, Bonferroni's multiple comparison test). (H and I)  
836  $Ca^{2+}$  responses to both glucose and KCl are impaired in 8 weeks HFD  $\beta$ PHD3KO islets, as  
837 shown by mean traces (H), as well as the summary bar graph (I) (n = 21-24 islets from 2  
838 animals/genotype) (two-way ANOVA; Sidak's multiple comparison test). (J and K) The  
839 proportion of apoptotic  $\beta$ -cells is increased in 8 weeks HFD  $\beta$ PHD3KO islets, shown by  
840 representative images (J) and summary bar graph (K) (scale bar = 42.5  $\mu$ m) (n = 8-9 islets)  
841 (unpaired t-test). (L)  $\alpha$ -cell/ $\beta$ -cell ratio is unchanged between 8 weeks HFD  $\beta$ PHD3CON and  
842 PHD3KO islets (scale bar = 42.5  $\mu$ m) (n = 10-17 islets, 2 animals/genotype) (unpaired t-test).  
843 (M) Expression of the ER stress markers *Ddit3*, *Xbp1* and *Hspa5* is similar in 8 weeks HFD  
844  $\beta$ PHD3CON and  $\beta$ PHD3KO islets (n = 3 animals/genotype) (paired t-test). (N) Expression of  
845 the HIF2 $\alpha$ -targets *Ccnd1* and *Dll4* is unchanged or downregulated, respectively, in 8 weeks  
846 HFD  $\beta$ PHD3KO islets (n = 3 animals/genotype) (paired t-test). Bar graphs show scatter plot  
847 with mean  $\pm$  SEM. Line graphs show mean  $\pm$  SEM. \*P<0.05, \*\*P<0.01 and NS, non-significant.  
848 PHD3, prolyl-hydroxylase 3; Exendin-4, Ex4; G3, 3 mM glucose; G16.7, 16.7 mM glucose;  
849 G17, 17 mM glucose.

Figure 1

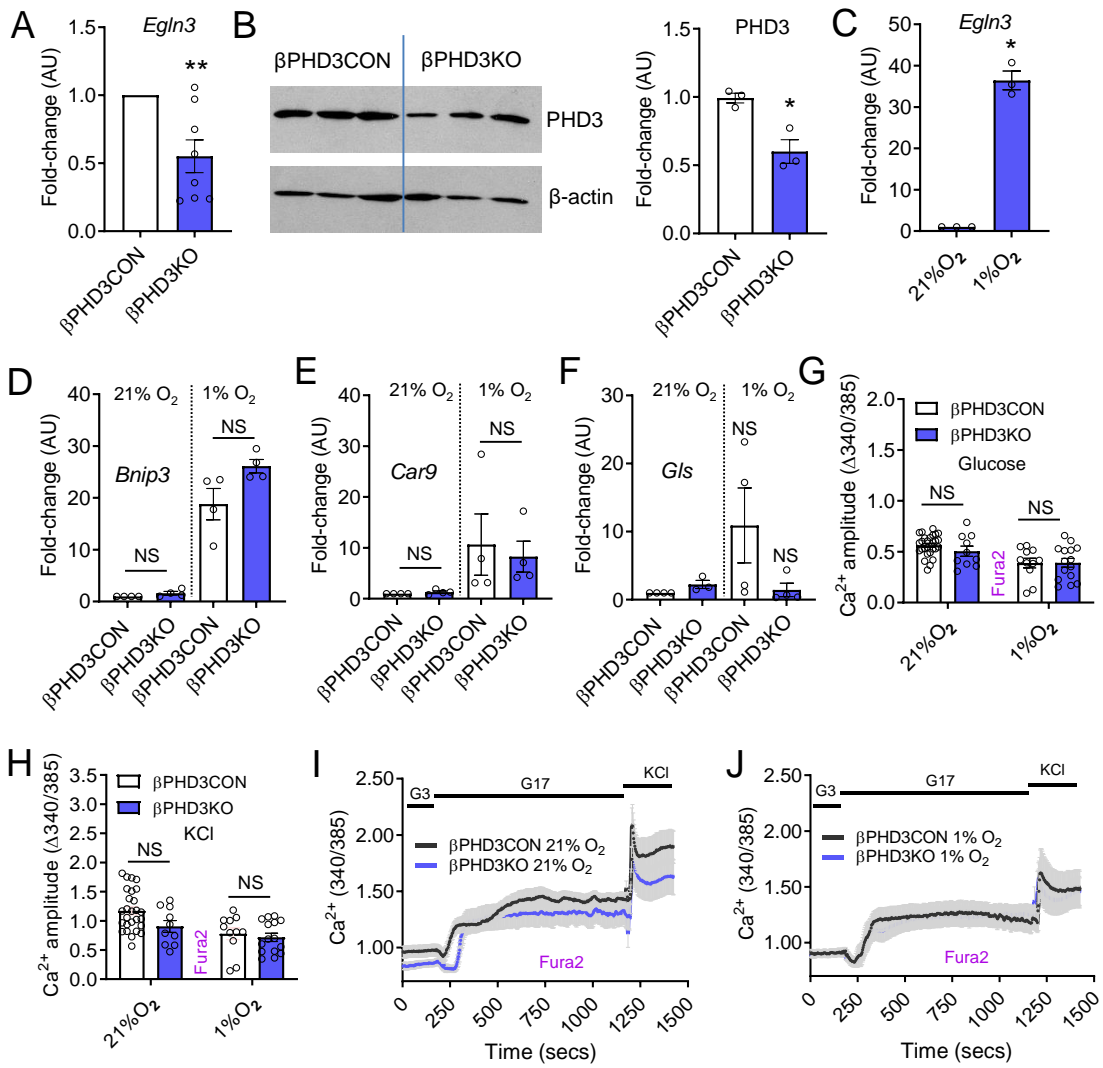



Figure 2

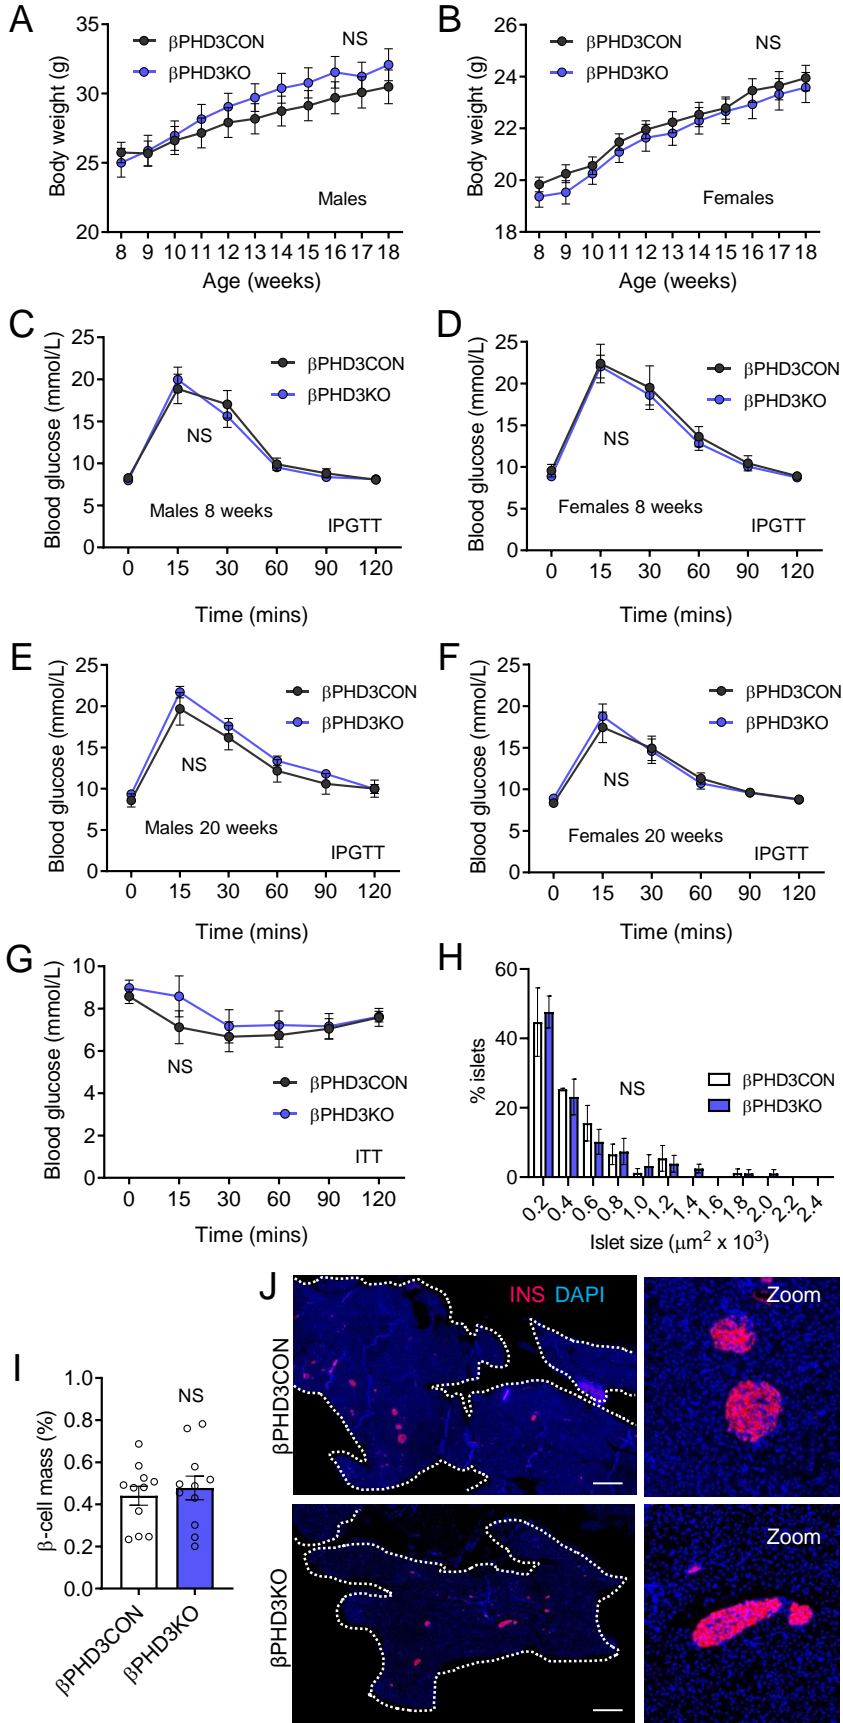

Figure 3

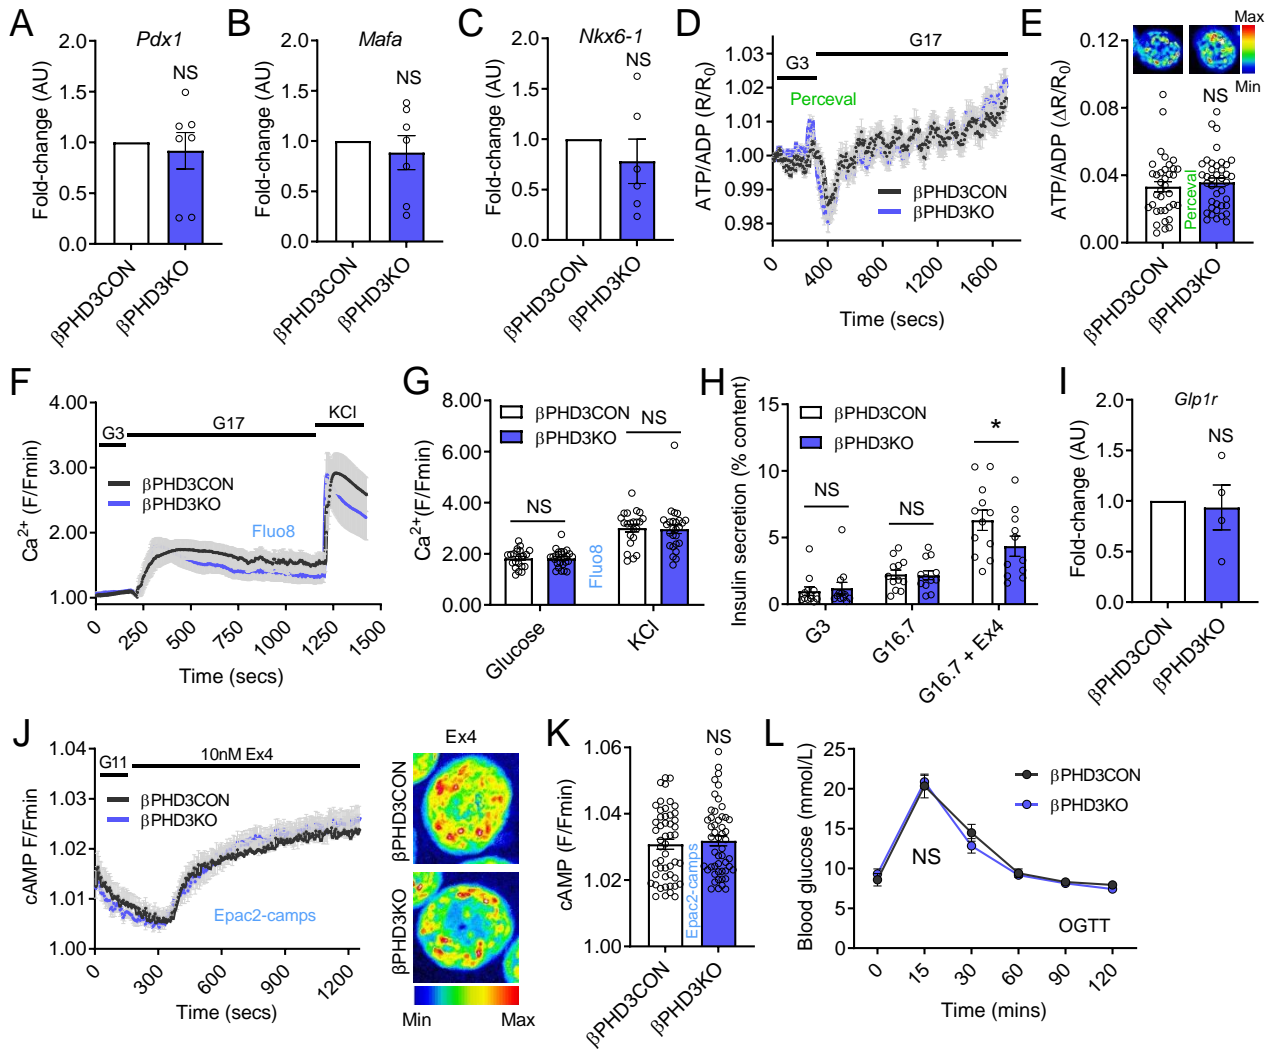

Figure 4

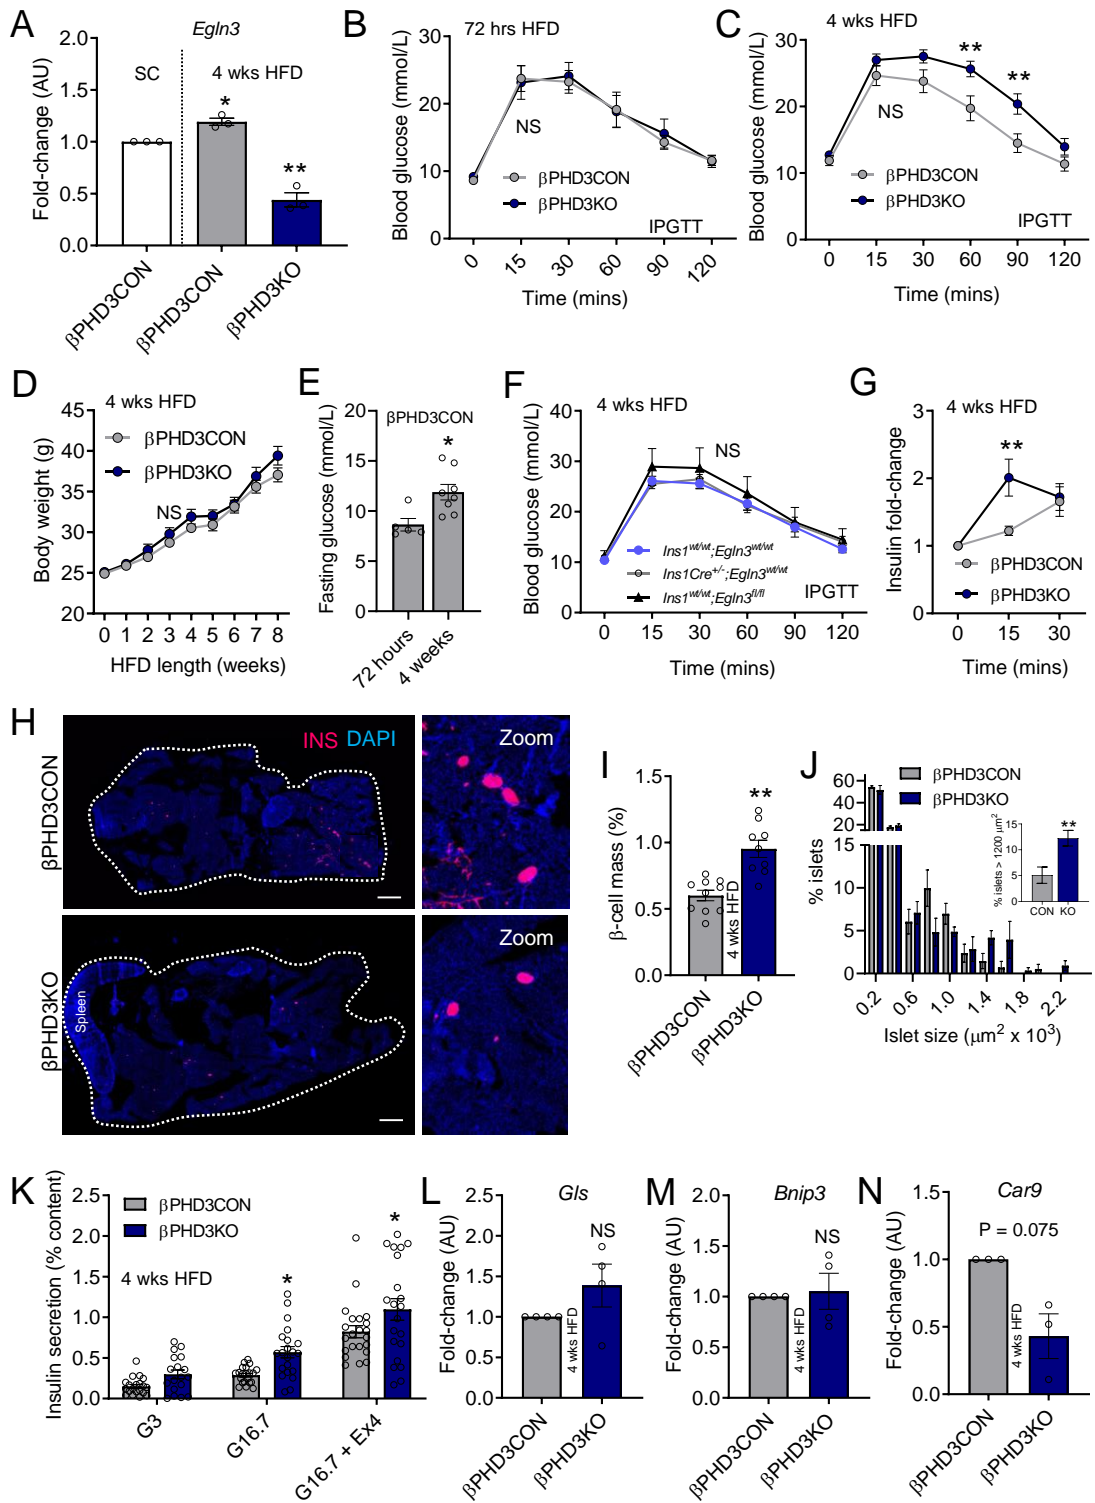

Figure 5

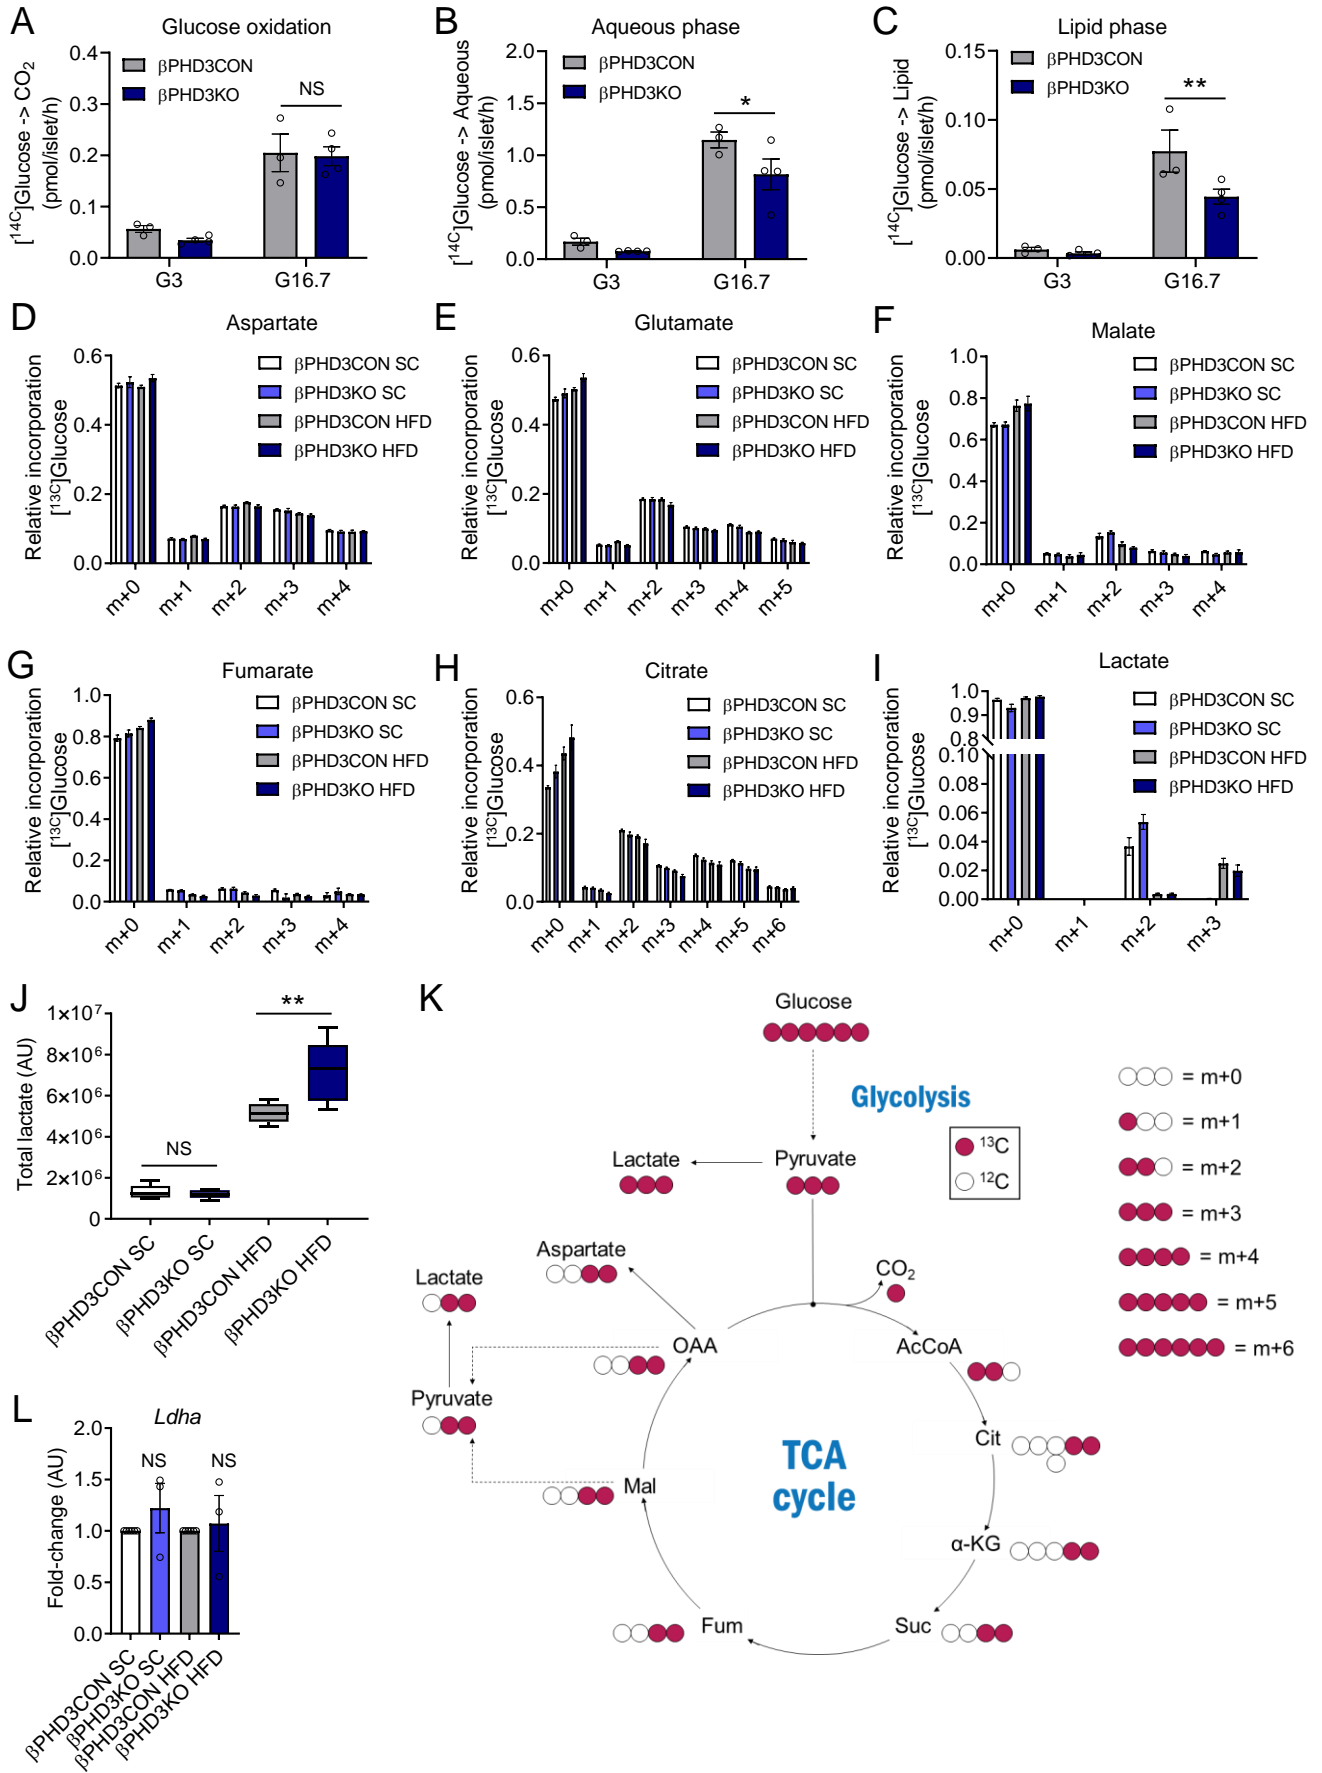

Figure 6

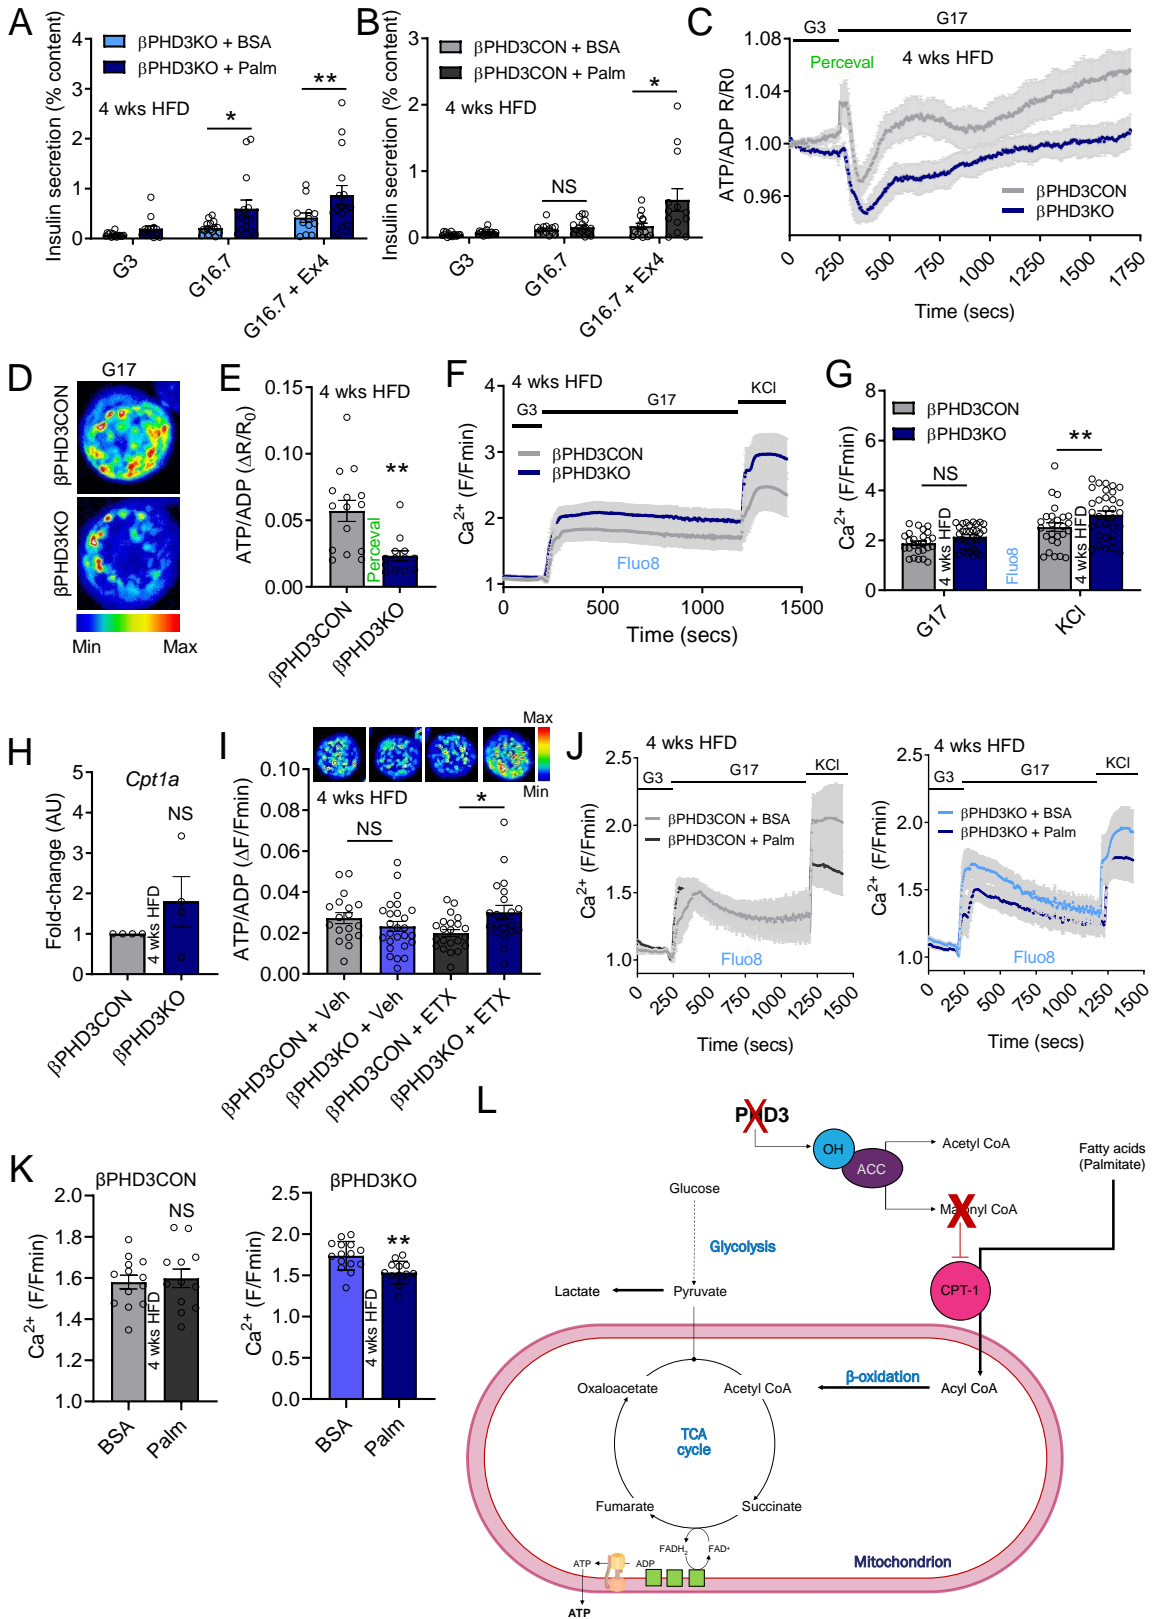

Figure 7

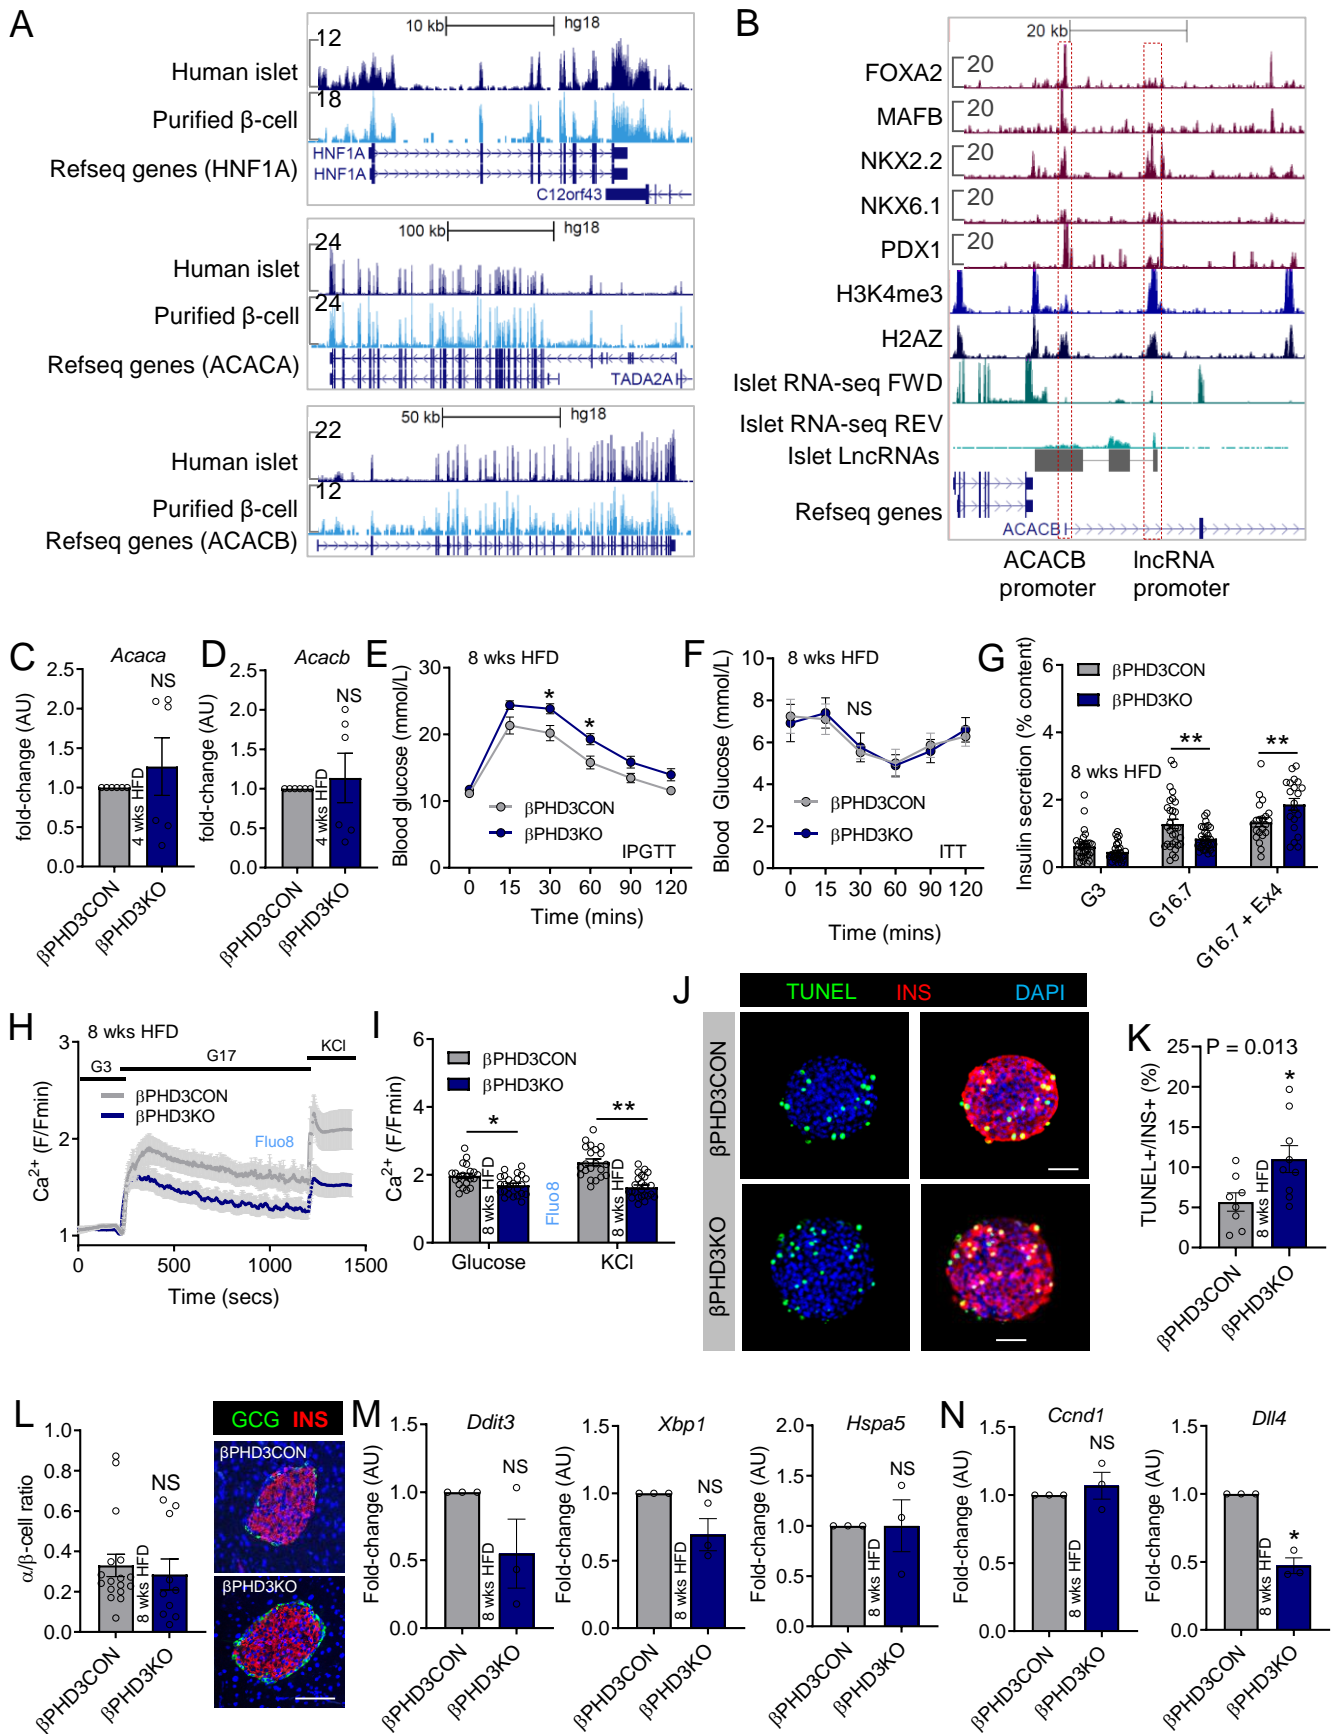

Source: https://www.biorxiv.org/content/10.1101/2020.04.30.068106v1.full.pdf
